# Supplementary material for: Evaluating outcomes of young forest management on a target species of conservation concern
Source: PeerJ. 2018 Jan 29;6:e4319. doi: 10.7717/peerj.4319 (PMC5793708; doi:10.7717/peerj.4319)
Supplement: Supplemental Information 2 — Raw Golden-winged Warbler nest and fledgling survival data used to inform spatially explicit models of full-season productivity in Peterson (2014) and in the models applied in this manuscript. [file peerj-06-4319-s002.xlsx]

## Sheet: Nest Data
Nest	Site	Year	Interval	Nestage (int midpoint)	IntFate
T1101N611	2	1	4	9	1
T1101N611	2	1	4	13	1
T1101N611	2	1	4	17	1
T1101N611	2	1	4	21	1
T1101N611	2	1	1	23.5	1
T1101N611	2	1	1	24.5	1
T1101N611	2	1	1	25.5	1
T1104N612	2	1	4	11	1
T1104N612	2	1	4	15	1
T1104N612	2	1	4	19	1
T1104N612	2	1	1	21.5	1
T1104N612	2	1	1	22.5	1
T1104N612	2	1	1	23.5	1
T1104N612	2	1	1	24.5	1
T1104N612	2	1	1	25.5	1
T1107N609	2	1	4	8	1
T1107N609	2	1	4	12	1
T1107N609	2	1	4	16	1
T1107N609	2	1	4	20	1
T1107N609	2	1	1	22.5	1
T1107N609	2	1	1	23.5	1
T1107N609	2	1	1	24.5	1
T1109N607	2	1	4	11	1
T1109N607	2	1	4	15	1
T1109N607	2	1	4	19	1
T1109N607	2	1	2	22	1
T1109N607	2	1	1	23.5	1
T1109N607	2	1	1	24.5	1
T1109N607	2	1	1	25.5	1
T1110N602	2	1	4	3	1
T1110N602	2	1	4	7	1
T1110N602	2	1	4	11	1
T1110N602	2	1	4	15	1
T1110N602	2	1	4	19	1
T1110N602	2	1	1	21.5	1
T1110N602	2	1	1	22.5	1
T1110N602	2	1	1	23.5	1
T1110N602	2	1	1	24.5	1
T1112N602	2	1	4	3	1
T1112N602	2	1	4	7	1
T1112N602	2	1	4	11	1
T1112N602	2	1	4	15	1
T1112N602	2	1	4	19	1
T1112N602	2	1	1	21.5	1
T1112N602	2	1	1	22.5	1
T1113N606	2	1	4	8	1
T1113N606	2	1	4	12	1
T1113N606	2	1	4	16	1
T1113N606	2	1	4	20	1
T1113N606	2	1	1	22.5	1
T1113N606	2	1	1	23.5	1
T1113N606	2	1	1	24.5	1
T1113N606	2	1	1	25.5	1
T1115R624	2	1	4	9	1
T1115R624	2	1	4	13	1
T1115R624	2	1	4	17	1
T1115R624	2	1	2	20	1
T1115R624	2	1	1	21.5	1
T1115R624	2	1	1	22.5	1
T1115R624	2	1	1	23.5	1
T1129N613	2	1	4	14	1
T1129N613	2	1	4	18	1
T1129N613	2	1	3	21.5	1
T1129N613	2	1	1	22.5	1
T1129N613	2	1	1	23.5	1
T1129N613	2	1	1	24.5	1
T1129N613	2	1	1	25.5	1
T1130N608	2	1	4	7	1
T1130N608	2	1	4	11	1
T1130N608	2	1	4	15	1
T1130N608	2	1	4	19	1
T1130N608	2	1	1	21.5	1
T1130N608	2	1	1	22.5	1
T1130N608	2	1	1	23.5	1
T1130N608	2	1	1	24.5	1
T1133R619	2	1	4	5	1
T1133R619	2	1	4	9	1
T1133R619	2	1	4	13	1
T1133R619	2	1	4	17	1
T1133R619	2	1	4	21	1
T1133R619	2	1	1	23.5	1
T1133R619	2	1	1	24.5	1
T1133R619	2	1	1	25.5	1
T1135N523	2	1	4	3	1
T1135N523	2	1	4	7	1
T1135N523	2	1	4	11	1
T1135N523	2	1	4	15	1
T1135N523	2	1	4	19	1
T1135N523	2	1	3	22.5	1
T1135N523	2	1	1	23.5	1
T1135N523	2	1	1	24.5	1
T1135N523	2	1	1	25.5	1
T1146N603	2	1	4	3	1
T1146N603	2	1	4	7	1
T1146N603	2	1	4	11	1
T1146N603	2	1	4	15	1
T1146N603	2	1	4	19	1
T1146N603	2	1	1	21.5	1
T1146N603	2	1	1	22.5	1
T1146N603	2	1	1	23.5	1
T1147R618	2	1	4	8	1
T1147R618	2	1	4	12	1
T1147R618	2	1	4	16	1
T1147R618	2	1	3	19.5	1
T1147R618	2	1	1	22	1
T1149N605	2	1	4	11	1
T1149N605	2	1	4	15	1
T1149N605	2	1	4	19	1
T1149N605	2	1	2	22	1
T1149N605	2	1	1	23.5	1
T1149N605	2	1	1	24.5	1
T1150R623	2	1	4	9	1
T1150R623	2	1	4	13	1
T1150R623	2	1	4	17	1
T1150R623	2	1	3	20.5	1
T1150R623	2	1	1	22.5	1
T1150R623	2	1	1	23.5	1
T1150R623	2	1	1	24.5	1
T1151N604	2	1	4	7	1
T1151N604	2	1	4	11	1
T1151N604	2	1	4	15	1
T1151N604	2	1	4	19	1
T1151N604	2	1	2	22	1
T1151N604	2	1	1	23.5	1
T1151N604	2	1	1	24.5	1
T1155N606	2	1	4	11	1
T1155N606	2	1	4	15	1
T1155N606	2	1	4	19	1
T1155N606	2	1	2	22	1
T1155N606	2	1	1	23.5	1
T1155N606	2	1	1	24.5	1
T1155N606	2	1	1	25.5	1
T1160N609	2	1	4	8	1
T1160N609	2	1	4	12	1
T1160N609	2	1	4	16	1
T1160N609	2	1	4	20	1
T1160N609	2	1	1	22.5	1
T1160N609	2	1	1	23.5	1
T1160N609	2	1	1	24.5	1
T1164N616	2	1	4	17	1
T1164N616	2	1	4	21	1
T1164N616	2	1	1	23.5	1
T1164N616	2	1	1	24.5	1
T1164N616	2	1	1	25.5	1
T1168N620	2	1	4	16	1
T1168N620	2	1	4	20	1
T1168N620	2	1	1	22.5	1
T1168N620	2	1	1	23.5	1
T1172N626	2	1	1	25.5	1
T1175R230	2	1	4	16	1
T1175R230	2	1	4	20	1
T1175R230	2	1	1	22.5	1
T1175R230	2	1	1	23.5	1
T1175R230	2	1	1	24.5	1
T1177R709	2	1	1	24.5	1
T1102N609	2	1	4	15	1
T1102N609	2	1	4	17	1
T1102N609	2	1	3	20.5	0
T1105N612	2	1	4	8	1
T1105N612	2	1	4	12	1
T1105N612	2	1	4	16	1
T1105N612	2	1	2	19	1
T1105N612	2	1	2	21	0
T1111N611	2	1	4	14	1
T1111N611	2	1	4	18	1
T1111N611	2	1	3	21.5	1
T1111N611	2	1	1	23.5	1
T1111N611	2	1	1	24.5	0
T1115N604	2	1	4	9	1
T1115N604	2	1	4	13	1
T1115N604	2	1	4	17	0
T1116N531	2	1	4	5	1
T1116N531	2	1	4	9	1
T1116N531	2	1	4	13	1
T1116N531	2	1	4	17	1
T1116N531	2	1	4	21	0
T1118N608	2	1	4	9	1
T1118N608	2	1	4	13	1
T1118N608	2	1	4	17	0
T1120N609	2	1	4	8	1
T1120N609	2	1	4	12	1
T1120N609	2	1	4	16	1
T1120N609	2	1	4	20	0
T1121N601	2	1	1	1.5	1
T1121N601	2	1	4	4	1
T1121N601	2	1	4	8	1
T1121N601	2	1	4	12	1
T1121N601	2	1	4	16	1
T1121N601	2	1	1	18.5	0
T1122N603	2	1	4	9	1
T1122N603	2	1	4	13	1
T1122N603	2	1	4	17	1
T1122N603	2	1	1	19.5	0
T1123N603	2	1	4	9	1
T1123N603	2	1	4	13	1
T1123N603	2	1	4	17	1
T1123N603	2	1	1	19.5	0
T1123R620	2	1	4	5	1
T1123R620	2	1	4	9	1
T1123R620	2	1	4	13	1
T1123R620	2	1	2	16	0
T1125N613	2	1	1	24.5	1
T1125N613	2	1	1	25.5	0
T1127N613	2	1	3	5.5	0
T1131N612	2	1	4	5	1
T1131N612	2	1	4	9	1
T1131N612	2	1	4	13	0
T1132R614	2	1	4	7	1
T1132R614	2	1	4	11	1
T1132R614	2	1	4	15	1
T1132R614	2	1	4	19	1
T1132R614	2	1	2	22	1
T1132R614	2	1	1	23.5	1
T1132R614	2	1	1	24.5	0
T1133N608	2	1	4	12	0
T1136N523	2	1	1	0.5	0
T1137N529	2	1	4	3	1
T1137N529	2	1	4	7	1
T1137N529	2	1	4	11	1
T1137N529	2	1	4	15	1
T1137N529	2	1	4	19	1
T1137N529	2	1	1	21.5	0
T1138N531	2	1	2	2	1
T1138N531	2	1	4	5	1
T1138N531	2	1	4	9	1
T1138N531	2	1	4	13	1
T1138N531	2	1	4	17	0
T1143N602	2	1	4	8	1
T1143N602	2	1	4	12	1
T1143N602	2	1	4	16	0
T1147N604	2	1	4	5	1
T1147N604	2	1	4	9	0
T1150N605	2	1	4	12	1
T1150N605	2	1	4	16	1
T1150N605	2	1	3	19.5	0
T1152N606	2	1	4	10	1
T1152N606	2	1	4	14	1
T1152N606	2	1	4	18	1
T1152N606	2	1	3	21.5	1
T1152N606	2	1	1	23.5	1
T1152N606	2	1	1	24.5	0
T1156N606	2	1	4	11	1
T1156N606	2	1	4	15	1
T1156N606	2	1	4	19	1
T1156N606	2	1	3	22.5	0
T1157N608	2	1	4	9	1
T1157N608	2	1	4	13	1
T1157N608	2	1	4	17	1
T1157N608	2	1	4	21	0
T1159R608	2	1	1	1.5	1
T1159R608	2	1	4	4	1
T1159R608	2	1	4	8	1
T1159R608	2	1	4	12	1
T1159R608	2	1	4	16	1
T1159R608	2	1	3	19.5	1
T1159R608	2	1	1	21.5	0
T1167N616	2	1	4	17	1
T1167N616	2	1	4	21	0
T1121R629	2	1	4	7	1
T1121R629	2	1	4	11	1
T1121R629	2	1	4	15	1
T1121R629	2	1	4	19	0
T1202N	2	2	4	12	0
T1204N	2	2	4	19	1
T1204N	2	2	2	22	1
T1204N	2	2	1	23.5	1
T1204N	2	2	1	24	1
T12100N	2	2	4	12	1
T12100N	2	2	4	16	1
T12100N	2	2	4	20	1
T12100N	2	2	2	23	1
T12100N	2	2	1	23.5	0
T12101N	2	2	4	3	1
T12101N	2	2	4	6	1
T12101N	2	2	4	11	1
T12101N	2	2	4	15	1
T12101N	2	2	4	19	1
T12101N	2	2	1	21.5	0
T12102N	2	2	4	8	1
T12102N	2	2	4	12	1
T12102N	2	2	4	16	1
T12102N	2	2	4	20	1
T12102N	2	2	1	22.5	1
T12103N	2	2	4	17	1
T12103N	2	2	4	21	1
T12103N	2	2	1	23.5	1
T12103N	2	2	1	24.5	1
T12104N	2	2	2	1	1
T12104N	2	2	4	4	1
T12104N	2	2	4	8	1
T12104N	2	2	4	12	1
T12104N	2	2	4	16	1
T12104N	2	2	2	19	1
T12104N	2	2	1	20.5	1
T12105N	2	2	4	17	1
T12105N	2	2	3	20.5	1
T12105N	2	2	1	22.5	1
T12106N	2	2	4	12	1
T12106N	2	2	4	16	1
T12106N	2	2	4	20	0
T12107N	2	2	4	18	1
T12107N	2	2	3	21.5	1
T12107N	2	2	1	23.5	1
T12108N	2	2	3	2	1
T12108N	2	2	4	5.5	1
T12108N	2	2	4	9.5	1
T12108N	2	2	4	13.5	0
T12110N	2	2	2	10	1
T12110N	2	2	4	13	0
T12111N	2	2	5	21	0
T12115N	2	2	1	23.5	1
T12116N	2	2	1	23.5	1
T12117N	2	2	2	22	1
T12117N	2	2	2	24	1
T12118N	2	2	4	21	1
T12118N	2	2	1	23.5	1
T12118N	2	2	1	24.5	1
T12120N	2	2	4	4	1
T12120N	2	2	4	8	1
T12120N	2	2	4	12	1
T12120N	2	2	4	16	1
T12120N	2	2	4	20	1
T12120N	2	2	1	22.5	1
T12121R	2	2	3	8	0
T12122N	2	2	1	22.5	1
T12122N	2	2	1	23.5	1
T12122N	2	2	1	24.5	1
T12125R	2	2	4	3	1
T12125R	2	2	4	7	1
T12125R	2	2	4	11	1
T12125R	2	2	4	15	1
T12125R	2	2	3	18.5	1
T12125R	2	2	1	20.5	0
T12126R	2	2	4	8	1
T12126R	2	2	4	12	1
T12126R	2	2	4	16	1
T12126R	2	2	4	20	1
T12126R	2	2	1	22.5	1
T12126R	2	2	1	23.5	1
T1212N	2	2	4	3	1
T1212N	2	2	4	7	1
T1212N	2	2	4	11	1
T1212N	2	2	4	15	1
T1212N	2	2	4	19	1
T1212N	2	2	3	22.5	1
T1215N	2	2	4	3	1
T1215N	2	2	4	7	1
T1215N	2	2	4	11	1
T1215N	2	2	4	15	0
T1216N	2	2	2	2	1
T1216N	2	2	5	5.5	0
T1217N	2	2	4	3	1
T1217N	2	2	4	7	1
T1217N	2	2	4	11	1
T1217N	2	2	4	15	1
T1217N	2	2	4	19	1
T1217N	2	2	1	21.5	1
T1217N	2	2	1	22.5	1
T1217N	2	2	1	23.5	1
T1221R	2	2	3	9.5	1
T1221R	2	2	4	13	0
T1222N	2	2	4	13	1
T1222N	2	2	4	17	1
T1222N	2	2	4	21	1
T1222N	2	2	1	23.5	1
T1222N	2	2	1	24.5	1
T1224N	2	2	1	3	0
T1226N	2	2	4	7	1
T1226N	2	2	4	11	1
T1226N	2	2	4	15	1
T1226N	2	2	4	19	1
T1226N	2	2	2	22	1
T1226N	2	2	1	23.5	1
T1226N	2	2	1	24.5	1
T1228N	2	2	4	13	1
T1228N	2	2	4	17	1
T1228N	2	2	4	21	0
T1229N	2	2	1	1.5	1
T1229N	2	2	4	4	1
T1229N	2	2	4	8	1
T1229N	2	2	4	12	1
T1229N	2	2	4	16	1
T1229N	2	2	4	20	0
T1231N	2	2	4	2	1
T1231N	2	2	4	6	1
T1231N	2	2	4	10	1
T1231N	2	2	4	14	1
T1231N	2	2	4	18	0
T1232N	2	2	4	6	1
T1232N	2	2	4	10	1
T1232N	2	2	4	14	1
T1232N	2	2	4	18	1
T1232N	2	2	2	21	1
T1232N	2	2	1	22.5	1
T1232N	2	2	1	23.5	1
T1234N	2	2	4	3	1
T1234N	2	2	4	7	1
T1234N	2	2	4	11	1
T1234N	2	2	4	15	1
T1234N	2	2	4	19	1
T1234N	2	2	2	22	1
T1234N	2	2	1	23.5	1
T1235R	2	2	4	3	1
T1235R	2	2	4	7	1
T1235R	2	2	4	11	1
T1235R	2	2	4	15	1
T1235R	2	2	4	19	1
T1235R	2	2	1	21.5	1
T1235R	2	2	1	22.5	1
T1235R	2	2	1	23.5	1
T1236N	2	2	4	6	1
T1236N	2	2	4	10	1
T1236N	2	2	4	14	1
T1236N	2	2	4	18	1
T1236N	2	2	2	21	1
T1236N	2	2	1	22.5	1
T1236N	2	2	1	23.5	1
T1236N	2	2	1	24.5	1
T1239N	2	2	2	12	1
T1239N	2	2	4	15	1
T1239N	2	2	4	19	0
T1241N	2	2	4	9	1
T1241N	2	2	4	13	1
T1241N	2	2	4	17	1
T1241N	2	2	4	21	0
T1242N	2	2	4	3	1
T1242N	2	2	4	7	1
T1242N	2	2	4	11	1
T1242N	2	2	4	15	1
T1242N	2	2	4	19	1
T1242N	2	2	2	22	1
T1242N	2	2	1	23.5	1
T1243N	2	2	4	7	1
T1243N	2	2	4	11	1
T1243N	2	2	4	15	1
T1243N	2	2	4	19	1
T1243N	2	2	2	22	0
T1246N	2	2	4	8	1
T1246N	2	2	4	12	1
T1246N	2	2	4	16	0
T1247N	2	2	4	12	1
T1247N	2	2	4	16	1
T1247N	2	2	4	20	1
T1247N	2	2	2	23	1
T1247N	2	2	1	24.5	1
T1248N	2	2	4	10	1
T1248N	2	2	4	14	1
T1248N	2	2	4	18	1
T1248N	2	2	3	21.5	1
T1249N	2	2	4	5	1
T1249N	2	2	4	9	1
T1249N	2	2	4	13	1
T1249N	2	2	4	17	1
T1249N	2	2	4	21	1
T1249N	2	2	1	23.5	1
T1249N	2	2	1	24.5	1
T1249N	2	2	1	25.5	1
T1252N	2	2	4	5	1
T1252N	2	2	4	9	1
T1252N	2	2	4	13	1
T1252N	2	2	4	17	1
T1252N	2	2	3	20.5	0
T1253R	2	2	4	15	1
T1253R	2	2	4	19	1
T1253R	2	2	2	22	1
T1255N	2	2	4	3	1
T1255N	2	2	2	6	0
T1256N	2	2	2	2	1
T1256N	2	2	3	4.5	0
T1257N	2	2	4	6	1
T1257N	2	2	4	10	1
T1257N	2	2	4	14	0
T1258N	2	2	4	12	1
T1258N	2	2	4	16	1
T1258N	2	2	4	20	0
T1259N	2	2	3	2.5	1
T1259N	2	2	4	6	1
T1259N	2	2	4	10	1
T1259N	2	2	4	14	1
T1259N	2	2	4	18	0
T1260N	2	2	4	11	1
T1260N	2	2	4	15	1
T1260N	2	2	4	19	0
T1261N	2	2	4	3	0
T1262N	2	2	4	8	1
T1262N	2	2	4	12	1
T1262N	2	2	4	16	1
T1262N	2	2	2	19	0
T1263N	2	2	4	8	1
T1263N	2	2	4	12	1
T1263N	2	2	4	16	0
T1265N	2	2	4	5	1
T1265N	2	2	4	9	1
T1265N	2	2	4	13	1
T1265N	2	2	4	17	0
T1266N	2	2	4	3	1
T1266N	2	2	4	7	1
T1266N	2	2	4	11	0
T1267N	2	2	4	3	1
T1267N	2	2	2	6	0
T1268N	2	2	4	11	1
T1268N	2	2	4	15	1
T1268N	2	2	4	19	1
T1268N	2	2	2	22	1
T1269N	2	2	4	3	1
T1269N	2	2	4	7	1
T1269N	2	2	4	11	1
T1269N	2	2	4	15	1
T1269N	2	2	4	19	1
T1269N	2	2	1	21.5	1
T1269N	2	2	1	22.5	1
T1269N	2	2	1	23.5	1
T1270N	2	2	1	1.5	0
T1271N	2	2	5	12.5	1
T1272N	2	2	1	2.5	1
T1272N	2	2	4	5	1
T1272N	2	2	4	9	1
T1272N	2	2	4	13	1
T1272N	2	2	4	17	0
T1273N	2	2	1	13.5	1
T1273N	2	2	4	16	1
T1273N	2	2	4	20	0
T1275N	2	2	5	12.5	0
T1276N	2	2	1	3.5	1
T1276N	2	2	4	6	1
T1276N	2	2	4	10	0
T1276R	2	2	4	7	1
T1276R	2	2	4	11	1
T1276R	2	2	4	15	1
T1276R	2	2	4	19	0
T1277N	2	2	2	10	1
T1277N	2	2	4	13	1
T1277N	2	2	4	17	1
T1277N	2	2	4	21	0
T1278N	2	2	4	6	1
T1278N	2	2	4	10	1
T1278N	2	2	4	14	1
T1278N	2	2	4	18	1
T1278N	2	2	3	21.5	1
T1278N	2	2	1	23.5	1
T1278N	2	2	1	24.5	1
T1279N	2	2	4	10	1
T1279N	2	2	4	14	1
T1279N	2	2	4	18	1
T1279N	2	2	3	21.5	1
T1279N	2	2	1	23.5	1
T1280N	2	2	3	6.5	1
T1280N	2	2	4	10	0
T1281N	2	2	3	12.5	0
T1282N	2	2	4	8	1
T1282N	2	2	2	11	1
T1282N	2	2	4	15	0
T1283N	2	2	4	10	1
T1283N	2	2	2	13	1
T1283N	2	2	4	16	0
T1289N	2	2	4	2	1
T1289N	2	2	4	6	1
T1289N	2	2	4	10	1
T1289N	2	2	4	14	1
T1289N	2	2	4	18	1
T1289N	2	2	2	21	1
T1290N	2	2	2	9	1
T1290N	2	2	3	11.5	1
T1290N	2	2	4	15	0
T1291N	2	2	2	14	1
T1291N	2	2	3	16.5	1
T1291N	2	2	4	20	0
T1292N	2	2	4	11	1
T1292N	2	2	4	15	1
T1292N	2	2	4	19	1
T1292N	2	2	2	22	1
T1292N	2	2	1	23.5	1
T1293R	2	2	4	2	1
T1293R	2	2	4	6	1
T1293R	2	2	4	10	1
T1293R	2	2	4	14	1
T1293R	2	2	4	18	1
T1293R	2	2	2	21	1
T1293R	2	2	1	22.5	1
T1293R	2	2	1	23.5	0
T1294N	2	2	4	15	1
T1294N	2	2	4	19	1
T1294N	2	2	2	22	1
T1294N	2	2	1	23.5	1
T1294N	2	2	1	24.5	1
T1295R	2	2	4	2	1
T1295R	2	2	4	6	1
T1295R	2	2	2	9	1
T1295R	2	2	4	12	0
T1296N	2	2	4	14	1
T1296N	2	2	4	18	1
T1296N	2	2	4	22	1
T1297N	2	2	1	10.5	0
T1298N	2	2	1	9.5	0
T1299N	2	2	4	6	1
T1299N	2	2	4	10	1
T1299N	2	2	4	14	1
T1299N	2	2	4	18	1
T1299N	2	2	2	21	1
T1299N	2	2	1	22.5	1
R1201N512	3	2	4	2	1
R1201N512	3	2	4	6	1
R1201N512	3	2	4	10	1
R1201N512	3	2	3	13.5	1
R1201N512	3	2	3	16.5	0
R1202N522	3	2	4	9	1
R1202N522	3	2	4	13	1
R1202N522	3	2	4	17	1
R1202N522	3	2	4	21	1
R1202N522	3	2	1	23.5	1
R1202N522	3	2	1	24.5	1
R1202N522	3	2	1	25.5	1
R1203N529	3	2	4	3	1
R1203N529	3	2	4	7	1
R1203N529	3	2	4	11	1
R1203N529	3	2	4	15	1
R1203N529	3	2	4	19	1
R1203N529	3	2	1	21.5	1
R1203N529	3	2	1	22.5	1
R1203N529	3	2	1	23.5	1
R1203N529	3	2	1	24.5	1
R1204N529	3	2	4	9	1
R1204N529	3	2	4	13	1
R1204N529	3	2	4	17	1
R1204N529	3	2	2	20	1
R1204N529	3	2	1	21.5	1
R1204N529	3	2	1	22.5	1
R1204N529	3	2	1	23.5	1
R1209N525	3	2	4	3	1
R1209R602	3	2	4	5	1
R1209R602	3	2	4	9	1
R1209R602	3	2	4	13	1
R1209R602	3	2	4	17	1
R1209R602	3	2	1	19.5	1
R1209R602	3	2	1	20.5	1
R1209R602	3	2	1	21.5	1
R1209R602	3	2	1	22.5	1
R1211N525	3	2	4	7	1
R1211R606	3	2	4	8	1
R1211R606	3	2	4	12	0
R1212N526	3	2	4	7	0
R1214N526	3	2	4	8	1
R1214N526	3	2	4	12	1
R1214N526	3	2	4	16	1
R1214N526	3	2	4	20	1
R1214N526	3	2	1	22.5	1
R1214N526	3	2	1	23.5	1
R1217N527	3	2	4	7	1
R1217N527	3	2	4	11	1
R1217N527	3	2	4	15	1
R1217N527	3	2	4	19	1
R1217N527	3	2	3	22.5	1
R1217N527	3	2	1	24.5	1
R1221N528	3	2	4	6	1
R1221N528	3	2	4	10	1
R1221N528	3	2	4	14	1
R1221N528	3	2	4	18	1
R1221N528	3	2	3	21.5	1
R1221N528	3	2	1	23.5	0
R1222N528	3	2	4	8	0
R1222R611	3	2	4	12	1
R1222R611	3	2	4	16	1
R1222R611	3	2	3	19.5	1
R1223N516	3	2	4	5	1
R1223N516	3	2	4	9	1
R1223N516	3	2	4	13	1
R1223N516	3	2	4	17	1
R1223N516	3	2	3	20.5	1
R1223N516	3	2	1	22.5	1
R1223N516	3	2	1	23.5	1
R1224N522	3	2	4	7	1
R1224N522	3	2	4	11	1
R1224N522	3	2	4	15	1
R1224N522	3	2	4	19	1
R1224N522	3	2	1	21.5	1
R1224N522	3	2	1	22.5	1
R1224N522	3	2	1	23.5	1
R1228N531	3	2	4	7	1
R1228N531	3	2	4	11	1
R1228N531	3	2	4	15	1
R1228N531	3	2	4	19	1
R1228N531	3	2	1	21.5	1
R1228N531	3	2	1	22.5	1
R1230N527	3	2	2	2	1
R1230R611	3	2	3	11.5	1
R1230R611	3	2	2	14	1
R1230R611	3	2	4	17	0
R1231N531	3	2	4	3	1
R1231N531	3	2	4	7	1
R1231N531	3	2	4	11	1
R1231N531	3	2	4	15	1
R1231N531	3	2	4	19	0
R1233N523	3	2	4	7	1
R1233N523	3	2	3	10.5	0
R1234N528	3	2	4	2	1
R1234N528	3	2	4	6	1
R1234N528	3	2	4	10	1
R1234N528	3	2	4	14	1
R1234N528	3	2	4	18	1
R1234N528	3	2	3	21.5	0
R1235N521	3	2	3	4.5	1
R1235N521	3	2	4	8	1
R1236N601	3	2	4	10	1
R1236N601	3	2	4	14	1
R1236N601	3	2	4	18	1
R1236N601	3	2	1	20.5	1
R1236N601	3	2	1	21.5	1
R1236N601	3	2	1	22.5	1
R1236N601	3	2	1	23.5	1
R1236N601	3	2	1	24.5	1
R1239N526	3	2	4	3	1
R1239R610	3	2	4	9	1
R1239R610	3	2	4	13	1
R1239R610	3	2	4	17	1
R1239R610	3	2	3	20.5	1
R1239R610	3	2	1	22.5	1
R1240N527	3	2	4	3	1
R1240N527	3	2	4	7	1
R1240N527	3	2	4	11	1
R1240N527	3	2	3	14.5	1
R1241N528	3	2	4	5	0
R1244N529	3	2	4	15	1
R1244N529	3	2	4	19	1
R1244N529	3	2	1	21.5	1
R1244N529	3	2	1	22.5	1
R1244N529	3	2	1	23.5	1
R1247N531	3	2	4	12	1
R1247N531	3	2	4	16	1
R1247N531	3	2	3	19.5	1
R1247N531	3	2	1	21.5	1
R1247N531	3	2	1	22.5	1
R1247N531	3	2	1	23.5	1
R1248N602	3	2	4	11	1
R1248N602	3	2	4	15	1
R1248N602	3	2	4	19	1
R1248N602	3	2	1	21.5	1
R1248N602	3	2	1	22.5	1
R1249N603	3	2	4	8	1
R1249N603	3	2	4	12	1
R1249N603	3	2	4	16	1
R1250N604	3	2	3	4.5	0
R1251N605	3	2	4	11	1
R1251N605	3	2	4	15	1
R1251N605	3	2	4	19	1
R1251N605	3	2	2	22	1
R1251N605	3	2	1	23.5	0
R1256N606	3	2	4	5	1
R1256N606	3	2	5	9.5	0
R1261N607	3	2	1	24.5	1
R1107N529	3	1	4	3	1
R1107N529	3	1	4	7	1
R1107N529	3	1	4	11	1
R1107N529	3	1	4	15	1
R1107N529	3	1	4	19	1
R1107N529	3	1	2	22	1
R1101N604	3	1	1	23.5	1
R1101N604	3	1	4	4	1
R1101N604	3	1	4	8	1
R1101N604	3	1	4	12	1
R1101N604	3	1	4	16	1
R1101N604	3	1	4	20	1
R1101N604	3	1	1	22.5	1
R1130N612	3	1	4	11	1
R1130N612	3	1	4	15	1
R1130N612	3	1	4	19	1
R1130N612	3	1	1	21.5	1
R1130N612	3	1	1	22.5	1
R1132N616	3	1	4	20	1
R1132N616	3	1	1	22.5	1
R1132N616	3	1	1	23.5	1
R1102N602	3	1	4	7	1
R1102N602	3	1	4	11	1
R1102N602	3	1	4	15	1
R1102N602	3	1	4	19	1
R1102N602	3	1	2	22	1
R1102N602	3	1	1	23.5	1
R1103N606	3	1	4	7	1
R1103N606	3	1	4	11	1
R1103N606	3	1	4	15	1
R1103N606	3	1	4	19	1
R1103N606	3	1	2	22	1
R1103N606	3	1	1	23.5	1
R1127N610	3	1	4	16	1
R1127N610	3	1	4	20	1
R1127N610	3	1	1	22.5	1
R1127N610	3	1	1	23.5	1
R1128N610	3	1	4	16	1
R1128N610	3	1	4	20	1
R1128N610	3	1	1	22.5	1
R1128N610	3	1	1	23.5	1
R1104N603	3	1	4	9	1
R1104N603	3	1	4	13	1
R1104N603	3	1	4	17	1
R1104N603	3	1	4	21	1
R1104N603	3	1	1	22.5	1
R1105N603	3	1	4	11	1
R1105N603	3	1	4	15	1
R1105N603	3	1	4	19	1
R1105N603	3	1	2	22	1
R1105N603	3	1	1	23.5	1
R1115N526	3	1	4	3	1
R1115N526	3	1	4	7	1
R1115N526	3	1	2	10	0
R1123N605	3	1	4	6	1
R1123N605	3	1	4	10	1
R1123N605	3	1	4	14	1
R1123N605	3	1	4	18	1
R1123N605	3	1	1	20.5	1
R1123N605	3	1	1	21.5	0
R1118N531	3	1	4	3	1
R1118N531	3	1	4	7	1
R1118N531	3	1	4	11	1
R1118N531	3	1	4	15	1
R1118N531	3	1	4	19	1
R1118N531	3	1	1	21.5	0
R1120N601	3	1	4	4	1
R1120N601	3	1	4	8	1
R1120N601	3	1	3	11.5	0
R1123R629	3	1	4	6	1
R1123R629	3	1	4	10	1
R1123R629	3	1	4	14	1
R1123R629	3	1	4	18	1
R1123R629	3	1	1	20.5	0
R1129R701	3	1	4	10	1
R1129R701	3	1	4	14	0
R1116N528	3	1	4	3	1
R1116N528	3	1	4	7	1
R1116N528	3	1	4	11	0
R1126N608	3	1	4	11	0
R1129N611	3	1	3	11.5	0
R1125N607	3	1	4	9	1
R1125N607	3	1	4	13	0
R1124N608	3	1	4	9	1
R1124N608	3	1	4	13	0
R1131N616	3	1	2	21	0
M1218R625	1	2	4	7	1
M1218R625	1	2	4	11	1
M1218R625	1	2	4	15	1
M1218R625	1	2	3	18.5	1
M1218R625	1	2	1	20.5	1
M1218R625	1	2	1	21.5	1
M1221N611	1	2	4	8	1
M1221N611	1	2	4	12	1
M1221N611	1	2	4	16	1
M1221N611	1	2	4	20	1
M1221N611	1	2	1	22.5	1
M1221N611	1	2	1	23.5	1
M1221N611	1	2	1	24.5	1
M1217N602	1	2	4	3	1
M1217N602	1	2	4	7	1
M1217N602	1	2	4	11	1
M1217N602	1	2	4	15	1
M1217N602	1	2	4	19	1
M1217N602	1	2	2	22	1
M1217N602	1	2	1	23.5	1
M1215N605	1	2	4	8	1
M1215N605	1	2	4	12	1
M1215N605	1	2	4	16	1
M1215N605	1	2	4	20	1
M1215N605	1	2	1	22.5	1
M1215N605	1	2	1	23.5	1
M1210N601	1	2	4	9	1
M1210N601	1	2	4	13	1
M1210N601	1	2	4	17	1
M1210N601	1	2	2	20	1
M1210N601	1	2	1	21.5	1
M1210N601	1	2	1	22.5	1
M1210N601	1	2	1	23.5	1
M1210N601	1	2	1	24.5	1
M1220N608	1	2	4	17	1
M1220N608	1	2	4	21	1
M1220N608	1	2	1	23.5	1
M1203N601	1	2	4	8	1
M1203N601	1	2	4	12	1
M1203N601	1	2	4	16	1
M1203N601	1	2	4	20	1
M1222N615	1	2	2	21	1
M1201N517	1	2	4	2	1
M1201N517	1	2	4	6	1
M1201N517	1	2	4	10	1
M1201N517	1	2	4	14	1
M1201N517	1	2	4	18	1
M1201N517	1	2	4	22	1
M1209N605	1	2	1	13.5	1
M1209N605	1	2	4	16	1
M1209N605	1	2	4	20	1
M1209N605	1	2	1	22.5	1
M1209N605	1	2	1	23.5	1
M1211N526	1	2	4	7	1
M1211N526	1	2	4	11	1
M1211N526	1	2	4	15	1
M1211N526	1	2	4	19	1
M1211N526	1	2	2	22	1
M1212N528	1	2	4	11	1
M1212N528	1	2	4	15	1
M1212N528	1	2	4	19	1
M1212N528	1	2	2	22	1
M1212N528	1	2	1	23.5	1
M1212N528	1	2	1	24.5	1
M1213R614	1	2	4	4	1
M1213R614	1	2	4	8	1
M1213R614	1	2	4	12	1
M1213R614	1	2	4	16	1
M1213R614	1	2	2	19	1
M1213R614	1	2	1	20.5	0
M1216N612	1	2	4	8	1
M1216N612	1	2	4	12	1
M1216N612	1	2	4	16	0
M1213N605	1	2	2	10	1
M1213N605	1	2	2	12	0
M1219N611	1	2	1	12.5	0
M1218N603	1	2	4	11	1
M1218N603	1	2	4	15	1
M1218N603	1	2	4	19	1
M1218N603	1	2	1	21.5	0
M1208N606	1	2	4	8	1
M1208N606	1	2	4	12	1
M1208N606	1	2	4	16	0
M1214N605	1	2	4	7	1
M1214N605	1	2	4	11	1
M1214N605	1	2	4	15	1
M1214N605	1	2	4	19	0
M1101N528	1	1	4	2	1
M1101N528	1	1	4	6	1
M1101N528	1	1	4	10	1
M1101N528	1	1	3	13.5	0
M1122N628	1	1	2	17	0
M1112N606	1	1	4	2	1
M1112N606	1	1	4	6	1
M1112N606	1	1	4	10	1
M1112N606	1	1	4	14	1
M1112N606	1	1	4	18	1
M1112N606	1	1	2	21	1
M1112N606	1	1	1	22.5	0
M1116N614	1	1	4	2	1
M1116N614	1	1	4	6	1
M1116N614	1	1	4	10	1
M1116N614	1	1	4	14	1
M1116N614	1	1	4	18	1
M1116N614	1	1	2	21	1
M1116N614	1	1	1	22.5	0
M1115N611	1	1	4	2	1
M1115N611	1	1	4	6	1
M1115N611	1	1	4	10	1
M1115N611	1	1	4	14	1
M1115N611	1	1	4	18	1
M1115N611	1	1	2	21	1
M1115N611	1	1	1	22.5	0
M1110NB705	1	1	4	2	1
M1110NB705	1	1	2	5	0
M1113N608	1	1	4	2	1
M1113N608	1	1	4	6	1
M1113N608	1	1	4	10	1
M1113N608	1	1	4	18	1
M1113N608	1	1	4	21	1
M1113N608	1	1	2	22.5	1
M1113N608	1	1	1	23.5	1
M1118N624	1	1	1	23.5	1
M1119N625	1	1	1	23.5	1
M1125N706	1	1	2	22	1
M1125N706	1	1	1	23.5	1
M1104N629	1	1	4	16	1
M1104N629	1	1	4	20	1
M1104N629	1	1	1	22.5	1
M1104N629	1	1	1	23.5	1

## Sheet: Fledgling Data
Fledgling	brood	Interval	year	site	Age	IntFate
M1104JB	11104	1	1	1	1	0
M1104JC	11104	1	1	1	1	0
M1104JD	11104	1	1	1	1	0
M1113JA	11113	1	1	1	1	1
M1113JA	11113	1	1	1	2	1
M1113JA	11113	1	1	1	3	1
M1113JA	11113	2	1	1	5	1
M1113JA	11113	1	1	1	6	1
M1113JA	11113	1	1	1	7	1
M1113JA	11113	1	1	1	8	1
M1113JA	11113	1	1	1	9	1
M1113JA	11113	1	1	1	10	1
M1113JA	11113	1	1	1	11	1
M1113JA	11113	1	1	1	12	1
M1113JA	11113	1	1	1	13	1
M1113JA	11113	1	1	1	14	1
M1113JA	11113	1	1	1	15	1
M1113JA	11113	1	1	1	16	1
M1113JA	11113	1	1	1	17	1
M1113JB	11113	1	1	1	1	1
M1113JB	11113	1	1	1	2	1
M1113JB	11113	1	1	1	3	1
M1113JB	11113	1	1	1	4	1
M1113JB	11113	2	1	1	6	1
M1113JB	11113	1	1	1	7	1
M1113JB	11113	1	1	1	8	1
M1113JB	11113	1	1	1	9	1
M1113JB	11113	1	1	1	10	1
M1113JB	11113	1	1	1	11	1
M1113JB	11113	1	1	1	12	1
M1113JB	11113	1	1	1	13	1
M1113JB	11113	1	1	1	14	1
M1113JB	11113	1	1	1	15	1
M1113JB	11113	1	1	1	16	1
M1113JB	11113	1	1	1	17	1
M1115JC	11115	1	1	1	2	1
M1115JC	11115	1	1	1	3	1
M1115JC	11115	1	1	1	4	1
M1115JC	11115	1	1	1	5	1
M1115JC	11115	1	1	1	6	1
M1115JC	11115	1	1	1	7	1
M1115JC	11115	1	1	1	8	1
M1115JC	11115	1	1	1	9	1
M1115JC	11115	1	1	1	10	1
M1115JC	11115	1	1	1	11	1
M1115JC	11115	1	1	1	12	1
M1115JC	11115	1	1	1	13	1
M1115JC	11115	1	1	1	14	1
M1115JC	11115	1	1	1	15	1
M1115JC	11115	1	1	1	16	1
M1115JC	11115	1	1	1	17	1
M1116JC	11116	1	1	1	1	1
M1116JC	11116	1	1	1	2	1
M1116JC	11116	1	1	1	3	1
M1116JC	11116	1	1	1	4	1
M1116JC	11116	1	1	1	5	1
M1116JC	11116	1	1	1	6	1
M1116JC	11116	1	1	1	7	1
M1116JC	11116	1	1	1	8	1
M1116JC	11116	1	1	1	9	1
M1116JC	11116	1	1	1	10	1
M1116JC	11116	1	1	1	11	1
M1116JC	11116	1	1	1	12	1
M1116JC	11116	1	1	1	13	1
M1116JC	11116	1	1	1	14	1
M1116JC	11116	1	1	1	15	1
M1116JC	11116	1	1	1	16	1
M1116JC	11116	1	1	1	17	1
M1116JC	11116	1	1	1	18	1
M1118JA	11118	1	1	1	1	1
M1118JA	11118	1	1	1	2	1
M1118JA	11118	1	1	1	3	1
M1118JA	11118	1	1	1	4	1
M1118JA	11118	1	1	1	5	1
M1118JA	11118	1	1	1	6	1
M1118JA	11118	1	1	1	7	1
M1118JA	11118	1	1	1	8	1
M1118JA	11118	1	1	1	9	1
M1118JA	11118	1	1	1	10	1
M1118JA	11118	1	1	1	11	1
M1118JA	11118	1	1	1	12	1
M1118JA	11118	1	1	1	13	0
M1118JB	11118	1	1	1	1	0
M1118JC	11118	7	1	1	7	1
M1118JC	11118	1	1	1	8	1
M1118JC	11118	1	1	1	9	1
M1118JC	11118	1	1	1	10	1
M1118JC	11118	1	1	1	11	1
M1118JC	11118	1	1	1	12	1
M1118JC	11118	1	1	1	13	1
M1118JC	11118	1	1	1	14	1
M1118JC	11118	1	1	1	15	1
M1118JC	11118	1	1	1	16	1
M1118JC	11118	1	1	1	17	1
M1118JC	11118	1	1	1	18	1
M1118JC	11118	1	1	1	19	1
M1118JC	11118	1	1	1	20	1
M1118JC	11118	1	1	1	21	1
M1118JC	11118	1	1	1	22	1
M1118JC	11118	1	1	1	23	1
M1118JC	11118	1	1	1	24	1
M1119JA	11119	1	1	1	1	1
M1119JA	11120	1	1	1	2	1
M1119JA	11121	1	1	1	3	1
M1119JA	11122	1	1	1	4	1
M1119JB	11119	1	1	1	1	1
M1119JB	11119	1	1	1	2	1
M1119JB	11119	1	1	1	3	1
M1119JB	11119	1	1	1	4	1
M1119JB	11119	1	1	1	5	1
M1119JB	11119	1	1	1	6	1
M1119JB	11119	1	1	1	7	1
M1119JB	11119	1	1	1	8	1
M1119JB	11119	1	1	1	9	1
M1119JB	11119	1	1	1	10	1
M1119JB	11119	1	1	1	11	1
M1119JB	11119	1	1	1	12	1
M1119JB	11119	1	1	1	13	1
M1119JB	11119	1	1	1	14	1
M1119JB	11119	1	1	1	15	1
M1119JB	11119	1	1	1	16	1
M1119JB	11119	1	1	1	17	1
M1125JA	11125	1	1	1	1	1
M1125JA	11125	1	1	1	2	1
M1125JA	11125	1	1	1	3	1
M1125JA	11125	1	1	1	4	1
M1125JA	11125	1	1	1	5	1
M1125JA	11125	1	1	1	6	1
M1125JA	11125	1	1	1	7	1
M1125JA	11125	1	1	1	8	1
M1125JA	11125	1	1	1	9	1
M1125JA	11125	1	1	1	10	1
M1125JA	11125	1	1	1	11	1
M1125JA	11125	1	1	1	12	1
M1125JA	11125	1	1	1	13	1
M1125JA	11125	1	1	1	14	1
M1125JA	11125	1	1	1	15	1
M1125JA	11125	1	1	1	16	1
M1125JA	11125	1	1	1	17	1
M1125JA	11125	1	1	1	18	1
M1125JD	11125	1	1	1	1	1
M1125JD	11125	1	1	1	2	1
M1125JD	11125	1	1	1	3	1
M1125JD	11125	1	1	1	4	1
M1125JD	11125	1	1	1	5	1
M1125JD	11125	1	1	1	6	1
M1125JD	11125	1	1	1	7	1
M1125JD	11125	1	1	1	8	1
M1125JD	11125	1	1	1	9	1
M1125JD	11125	1	1	1	10	1
M1125JD	11125	1	1	1	11	1
M1125JD	11125	1	1	1	12	1
M1125JD	11125	1	1	1	13	1
M1125JD	11125	1	1	1	14	1
M1125JD	11125	1	1	1	15	1
M1125JD	11125	1	1	1	16	1
M1125JD	11125	1	1	1	17	1
M1125JD	11125	1	1	1	18	1
M1125JD	11125	1	1	1	19	1
M1201JA	11201	1	2	1	1	0
M1201JB	11201	1	2	1	1	1
M1201JB	11201	1	2	1	2	1
M1201JB	11201	1	2	1	3	1
M1201JB	11201	1	2	1	4	1
M1201JB	11201	1	2	1	5	1
M1201JB	11201	1	2	1	6	0
M1201JC	11201	1	2	1	1	1
M1201JC	11201	1	2	1	2	1
M1201JC	11201	1	2	1	3	1
M1201JC	11201	1	2	1	4	1
M1201JC	11201	9	2	1	13	1
M1201JC	11201	3	2	1	16	1
M1201JC	11201	5	2	1	21	1
M1201JC	11201	1	2	1	22	1
M1201JC	11201	1	2	1	23	1
M1201JC	11201	1	2	1	24	1
M1201JC	11201	1	2	1	25	1
M1201JC	11201	1	2	1	26	1
M1201JC	11201	1	2	1	27	1
M1201JC	11201	1	2	1	28	1
M1201JC	11201	1	2	1	29	1
M1201JC	11201	1	2	1	30	1
M1201JC	11201	1	2	1	31	1
M1201JC	11201	1	2	1	32	1
M1201JC	11201	1	2	1	33	1
M1201JC	11201	1	2	1	34	1
M1201JC	11201	1	2	1	35	1
M1201JC	11201	1	2	1	36	1
M1201JC	11201	1	2	1	37	1
M1201JC	11201	1	2	1	38	1
M1201JD	11201	1	2	1	1	1
M1201JD	11201	1	2	1	2	1
M1201JD	11201	1	2	1	3	1
M1201JD	11201	1	2	1	4	1
M1201JD	11201	1	2	1	5	1
M1201JD	11201	1	2	1	6	1
M1201JD	11201	1	2	1	7	1
M1201JD	11201	1	2	1	8	1
M1201JD	11201	1	2	1	9	1
M1201JD	11201	1	2	1	10	1
M1201JD	11201	1	2	1	11	1
M1201JD	11201	1	2	1	12	1
M1201JD	11201	1	2	1	13	1
M1201JD	11201	1	2	1	14	1
M1201JD	11201	1	2	1	15	1
M1201JD	11201	1	2	1	16	1
M1201JD	11201	1	2	1	17	1
M1201JD	11201	1	2	1	18	1
M1201JD	11201	1	2	1	19	1
M1201JD	11201	1	2	1	20	1
M1201JD	11201	1	2	1	21	1
M1201JD	11201	1	2	1	22	1
M1201JD	11201	1	2	1	23	1
M1201JD	11201	1	2	1	24	1
M1201JD	11201	1	2	1	25	1
M1201JD	11201	1	2	1	26	1
M1201JD	11201	1	2	1	27	1
M1201JD	11201	1	2	1	28	1
M1201JD	11201	1	2	1	29	1
M1201JD	11201	1	2	1	30	1
M1201JD	11201	1	2	1	31	1
M1201JD	11201	1	2	1	32	1
M1201JD	11201	1	2	1	33	1
M1203JA	11203	1	2	1	1	0
M1203JB	11203	1	2	1	1	1
M1203JB	11203	1	2	1	2	1
M1203JB	11203	1	2	1	3	1
M1203JB	11203	1	2	1	4	1
M1203JB	11203	1	2	1	5	1
M1203JB	11203	1	2	1	6	1
M1203JB	11203	1	2	1	7	1
M1203JB	11203	1	2	1	8	1
M1203JB	11203	1	2	1	9	1
M1203JB	11203	1	2	1	10	1
M1203JB	11203	1	2	1	11	1
M1203JB	11203	1	2	1	12	1
M1203JB	11203	1	2	1	13	1
M1203JB	11203	1	2	1	14	1
M1203JB	11203	1	2	1	15	1
M1203JB	11203	1	2	1	16	1
M1203JB	11203	1	2	1	17	1
M1203JB	11203	1	2	1	18	0
M1203JC	11203	1	2	1	1	1
M1203JC	11203	1	2	1	2	0
M1203JD	11203	1	2	1	1	1
M1203JD	11203	1	2	1	2	1
M1203JD	11203	1	2	1	3	1
M1203JD	11203	1	2	1	4	1
M1203JD	11203	1	2	1	5	0
M1209JC	11209	1	2	1	1	1
M1209JC	11209	1	2	1	2	1
M1209JC	11209	1	2	1	3	1
M1209JC	11209	1	2	1	4	1
M1209JC	11209	1	2	1	5	1
M1209JC	11209	1	2	1	6	1
M1209JC	11209	1	2	1	7	0
M1209JD	11209	8	2	1	8	1
M1209JD	11209	1	2	1	9	1
M1209JD	11209	4	2	1	13	1
M1209JD	11209	4	2	1	17	1
M1209JD	11209	1	2	1	18	1
M1209JD	11209	1	2	1	19	1
M1209JD	11209	1	2	1	20	1
M1209JD	11209	1	2	1	21	1
M1209JD	11209	1	2	1	22	1
M1209JD	11209	1	2	1	23	1
M1209JD	11209	2	2	1	25	1
M1209JD	11209	1	2	1	26	1
M1209JD	11209	1	2	1	27	1
M1209JD	11209	1	2	1	28	1
M1209JD	11209	1	2	1	29	1
M1209JD	11209	1	2	1	30	1
M1209JE	11209	1	2	1	1	0
M1210JA	11210	1	2	1	1	1
M1210JA	11210	1	2	1	2	1
M1210JA	11210	1	2	1	3	1
M1210JA	11210	9	2	1	12	1
M1210JA	11210	1	2	1	13	1
M1210JA	11210	1	2	1	14	1
M1210JA	11210	1	2	1	15	1
M1210JA	11210	1	2	1	16	1
M1210JA	11210	1	2	1	17	1
M1210JA	11210	1	2	1	18	1
M1210JA	11210	1	2	1	19	1
M1210JA	11210	1	2	1	20	1
M1210JA	11210	1	2	1	21	1
M1210JA	11210	1	2	1	22	1
M1210JD	11210	5	2	1	5	1
M1210JD	11210	8	2	1	13	1
M1210JD	11210	1	2	1	14	1
M1210JD	11210	1	2	1	15	1
M1210JD	11210	1	2	1	16	1
M1210JD	11210	1	2	1	17	1
M1210JD	11210	1	2	1	18	1
M1210JD	11210	1	2	1	19	1
M1210JD	11210	3	2	1	22	1
M1210JD	11210	1	2	1	23	1
M1210JD	11210	1	2	1	24	1
M1210JD	11210	1	2	1	25	1
M1210JD	11210	1	2	1	26	1
M1210JD	11210	1	2	1	27	1
M1210JD	11210	1	2	1	28	1
M1210JD	11210	1	2	1	29	1
M1210JE	11210	1	2	1	1	0
M1211JA	11211	1	2	1	1	1
M1211JA	11211	1	2	1	2	1
M1211JA	11211	1	2	1	3	1
M1211JA	11211	1	2	1	4	0
M1211JB	11211	1	2	1	1	1
M1211JB	11211	1	2	1	2	1
M1211JB	11211	1	2	1	3	1
M1211JB	11211	1	2	1	4	0
M1211JC	11211	1	2	1	1	1
M1211JC	11211	1	2	1	2	1
M1211JC	11211	1	2	1	3	1
M1211JC	11211	1	2	1	4	1
M1211JC	11211	1	2	1	5	1
M1211JC	11211	1	2	1	6	1
M1211JC	11211	1	2	1	7	1
M1211JC	11211	1	2	1	8	1
M1211JC	11211	1	2	1	9	1
M1211JC	11211	1	2	1	10	1
M1211JC	11211	1	2	1	11	1
M1211JC	11211	1	2	1	12	1
M1211JC	11211	1	2	1	13	1
M1211JC	11211	1	2	1	14	1
M1211JC	11211	1	2	1	15	1
M1211JC	11211	1	2	1	16	1
M1211JC	11211	1	2	1	17	1
M1211JC	11211	1	2	1	18	1
M1211JC	11211	1	2	1	19	1
M1211JC	11211	1	2	1	20	1
M1211JC	11211	1	2	1	21	1
M1211JC	11211	1	2	1	22	1
M1211JC	11211	1	2	1	23	1
M1211JC	11211	1	2	1	24	1
M1211JC	11211	1	2	1	25	1
M1211JC	11211	1	2	1	26	1
M1211JC	11211	2	2	1	28	1
M1211JC	11211	1	2	1	29	1
M1211JC	11211	1	2	1	30	1
M1211JC	11211	1	2	1	31	1
M1211JC	11211	1	2	1	32	1
M1212JB	11212	1	2	1	1	1
M1212JB	11212	1	2	1	2	1
M1212JB	11212	1	2	1	3	1
M1212JB	11212	1	2	1	4	1
M1212JB	11212	1	2	1	5	1
M1212JB	11212	1	2	1	6	1
M1212JB	11212	1	2	1	7	1
M1212JB	11212	1	2	1	8	1
M1212JB	11212	1	2	1	9	1
M1212JB	11212	1	2	1	10	1
M1212JB	11212	1	2	1	11	1
M1212JB	11212	1	2	1	12	1
M1212JB	11212	1	2	1	13	1
M1212JB	11212	1	2	1	14	1
M1212JB	11212	1	2	1	15	1
M1212JB	11212	1	2	1	16	1
M1212JB	11212	1	2	1	17	1
M1212JB	11212	1	2	1	18	1
M1212JB	11212	1	2	1	19	1
M1212JB	11212	1	2	1	20	1
M1212JB	11212	1	2	1	21	1
M1212JB	11212	1	2	1	22	1
M1212JB	11212	1	2	1	23	1
M1212JB	11212	1	2	1	24	1
M1212JB	11212	1	2	1	25	1
M1212JB	11212	1	2	1	26	1
M1212JB	11212	1	2	1	27	1
M1212JB	11212	1	2	1	28	1
M1212JB	11212	1	2	1	29	1
M1212JC	11212	1	2	1	1	1
M1212JC	11212	1	2	1	2	1
M1212JC	11212	1	2	1	3	0
M1212JD	11212	1	2	1	1	1
M1212JD	11212	1	2	1	2	1
M1212JD	11212	1	2	1	3	1
M1212JD	11212	1	2	1	4	0
M1217JB	11217	1	2	1	1	1
M1217JB	11217	1	2	1	2	1
M1217JB	11217	1	2	1	3	1
M1217JB	11217	1	2	1	4	1
M1217JC	11217	1	2	1	1	1
M1217JC	11217	1	2	1	2	1
M1217JC	11217	1	2	1	3	1
M1217JC	11217	1	2	1	4	1
M1217JC	11217	1	2	1	5	1
M1217JC	11217	1	2	1	6	1
M1217JC	11217	1	2	1	7	1
M1217JC	11217	1	2	1	8	1
M1217JC	11217	1	2	1	9	1
M1217JC	11217	1	2	1	10	1
M1217JC	11217	1	2	1	11	1
M1217JC	11217	1	2	1	12	1
M1217JC	11217	1	2	1	13	1
M1217JC	11217	1	2	1	14	1
M1217JC	11217	1	2	1	15	1
M1217JC	11217	1	2	1	16	1
M1217JC	11217	1	2	1	17	1
M1217JC	11217	1	2	1	18	1
M1217JC	11217	1	2	1	19	1
M1217JC	11217	1	2	1	20	1
M1217JC	11217	1	2	1	21	1
M1217JC	11217	1	2	1	22	1
M1217JC	11217	1	2	1	23	1
M1217JC	11217	1	2	1	24	1
M1217JC	11217	1	2	1	25	1
M1217JC	11217	1	2	1	26	1
M1217JC	11217	1	2	1	27	1
M1217JC	11217	1	2	1	28	1
M1217JC	11217	1	2	1	29	1
M1217JC	11217	1	2	1	30	1
M1218JG	11218	1	2	1	1	1
M1218JG	11218	1	2	1	2	1
M1218JG	11218	1	2	1	3	1
M1218JG	11218	1	2	1	4	1
M1218JG	11218	1	2	1	5	1
M1218JG	11218	1	2	1	6	1
M1218JG	11218	1	2	1	7	1
M1218JG	11218	1	2	1	8	1
M1218JG	11218	1	2	1	9	1
M1218JG	11218	1	2	1	10	1
M1218JG	11218	1	2	1	11	1
M1218JG	11218	1	2	1	12	1
M1218JG	11218	1	2	1	13	1
M1220JA	11220	1	2	1	1	1
M1220JA	11220	1	2	1	2	1
M1220JA	11220	1	2	1	3	1
M1220JA	11220	1	2	1	4	1
M1220JA	11220	1	2	1	5	1
M1220JA	11220	1	2	1	6	1
M1220JA	11220	1	2	1	7	1
M1220JA	11220	1	2	1	8	1
M1220JA	11220	1	2	1	9	1
M1220JA	11220	1	2	1	10	1
M1220JA	11220	1	2	1	11	1
M1220JA	11220	1	2	1	12	1
M1220JA	11220	1	2	1	13	1
M1220JA	11220	1	2	1	14	1
M1220JA	11220	1	2	1	15	1
M1220JA	11220	1	2	1	16	1
M1220JA	11220	1	2	1	17	1
M1220JA	11220	1	2	1	18	1
M1220JA	11220	1	2	1	19	1
M1220JA	11220	1	2	1	20	1
M1220JA	11220	1	2	1	21	1
M1220JA	11220	1	2	1	22	0
M1220JB	11220	1	2	1	1	1
M1220JB	11220	1	2	1	2	0
M1220JC	11220	1	2	1	1	1
M1220JC	11220	1	2	1	2	0
M1220JD	11220	1	2	1	1	1
M1220JD	11220	1	2	1	2	1
M1220JD	11220	1	2	1	3	1
M1220JD	11220	1	2	1	4	1
M1220JD	11220	1	2	1	5	1
M1220JD	11220	1	2	1	6	1
M1220JD	11220	1	2	1	7	1
M1220JD	11220	1	2	1	8	1
M1220JD	11220	1	2	1	9	1
M1220JD	11220	1	2	1	10	1
M1220JD	11220	1	2	1	11	1
M1220JD	11220	1	2	1	12	1
M1220JD	11220	1	2	1	13	1
M1220JD	11220	1	2	1	14	1
M1220JD	11220	1	2	1	15	1
M1220JD	11220	1	2	1	16	1
M1220JD	11220	1	2	1	17	1
M1220JD	11220	1	2	1	18	1
M1220JD	11220	1	2	1	19	1
M1220JD	11220	1	2	1	20	1
M1220JD	11220	1	2	1	21	1
M1220JD	11220	1	2	1	22	1
M1220JD	11220	1	2	1	23	1
M1220JD	11220	1	2	1	24	1
M1220JD	11220	1	2	1	25	1
M1220JD	11220	1	2	1	26	1
M1220JD	11220	1	2	1	27	1
M1220JD	11220	1	2	1	28	1
M1220JD	11220	1	2	1	29	1
M1220JD	11220	1	2	1	30	1
M1220JE	11220	1	2	1	1	1
M1220JE	11220	1	2	1	2	1
M1220JE	11220	1	2	1	3	1
M1220JE	11220	1	2	1	4	1
M1220JE	11220	1	2	1	5	1
M1220JE	11220	1	2	1	6	1
M1220JE	11220	1	2	1	7	1
M1220JE	11220	1	2	1	8	1
M1220JE	11220	1	2	1	9	1
M1220JE	11220	1	2	1	10	1
M1220JE	11220	1	2	1	11	1
M1220JE	11220	1	2	1	12	1
M1220JE	11220	1	2	1	13	1
M1220JE	11220	1	2	1	14	1
M1220JE	11220	1	2	1	15	1
M1220JE	11220	1	2	1	16	1
M1220JE	11220	1	2	1	17	1
M1220JE	11220	1	2	1	18	1
M1220JE	11220	1	2	1	19	1
M1220JE	11220	1	2	1	20	1
M1220JE	11220	1	2	1	21	1
M1220JE	11220	1	2	1	22	1
M1220JE	11220	1	2	1	23	1
M1220JE	11220	1	2	1	24	1
M1220JE	11220	1	2	1	25	1
M1220JE	11220	1	2	1	26	1
M1220JE	11220	1	2	1	27	1
M1220JE	11220	1	2	1	28	1
M1220JE	11220	1	2	1	29	1
M1220JE	11220	1	2	1	30	1
M1221JA	11221	1	2	1	1	0
M1221JB	11221	1	2	1	1	1
M1221JB	11221	1	2	1	2	1
M1221JB	11221	1	2	1	3	1
M1221JB	11221	1	2	1	4	1
M1221JB	11221	1	2	1	5	1
M1221JB	11221	1	2	1	6	1
M1221JB	11221	1	2	1	7	1
M1221JB	11221	1	2	1	8	1
M1221JB	11221	1	2	1	9	1
M1221JB	11221	1	2	1	10	1
M1221JB	11221	1	2	1	11	1
M1221JB	11221	1	2	1	12	1
M1221JB	11221	1	2	1	13	1
M1221JB	11221	1	2	1	14	1
M1221JB	11221	1	2	1	15	1
M1221JB	11221	1	2	1	16	1
M1221JB	11221	1	2	1	17	1
M1221JB	11221	1	2	1	18	1
M1221JB	11221	1	2	1	19	1
M1221JB	11221	1	2	1	20	1
M1221JB	11221	1	2	1	21	1
M1221JB	11221	1	2	1	22	1
M1221JB	11221	1	2	1	23	1
M1221JB	11221	1	2	1	24	1
M1221JB	11221	1	2	1	25	1
M1221JD	11221	1	2	1	1	1
M1221JD	11221	1	2	1	2	1
M1221JD	11221	1	2	1	3	1
M1221JD	11221	1	2	1	4	1
M1221JD	11221	1	2	1	5	1
M1221JD	11221	1	2	1	6	1
M1221JD	11221	1	2	1	7	1
M1221JD	11221	1	2	1	8	1
M1221JD	11221	1	2	1	9	1
M1221JD	11221	1	2	1	10	1
M1221JD	11221	1	2	1	11	1
M1221JD	11221	1	2	1	12	1
M1221JD	11221	1	2	1	13	1
M1221JD	11221	1	2	1	14	1
M1221JD	11221	1	2	1	15	1
M1221JD	11221	1	2	1	16	1
M1221JD	11221	1	2	1	17	1
M1221JD	11221	1	2	1	18	1
M1221JD	11221	1	2	1	19	1
M1221JD	11221	1	2	1	20	1
M1221JD	11221	1	2	1	21	1
M1221JD	11221	1	2	1	22	1
M1221JD	11221	1	2	1	23	1
M1221JD	11221	1	2	1	24	1
M1221JD	11221	1	2	1	25	1
M1221JE	11221	1	2	1	1	1
M1221JE	11221	1	2	1	2	1
M1221JE	11221	1	2	1	3	1
M1221JE	11221	1	2	1	4	1
M1221JE	11221	1	2	1	5	1
M1221JE	11221	1	2	1	6	1
M1221JE	11221	1	2	1	7	1
M1221JE	11221	1	2	1	8	1
M1221JE	11221	1	2	1	9	1
M1221JE	11221	1	2	1	10	1
M1221JE	11221	1	2	1	11	1
M1221JE	11221	1	2	1	12	1
M1221JE	11221	1	2	1	13	1
M1221JE	11221	1	2	1	14	1
M1221JE	11221	1	2	1	15	1
M1221JE	11221	1	2	1	16	1
M1221JE	11221	1	2	1	17	1
M1221JE	11221	1	2	1	18	1
M1221JE	11221	1	2	1	19	1
M1221JE	11221	1	2	1	20	1
M1221JE	11221	1	2	1	21	1
M1221JE	11221	1	2	1	22	1
M1221JE	11221	1	2	1	23	1
M1221JE	11221	1	2	1	24	1
M1221JE	11221	1	2	1	25	1
M1222JB	11222	1	2	1	1	0
M1222JC	11222	1	2	1	1	1
M1222JC	11222	1	2	1	2	1
M1222JC	11222	1	2	1	3	0
M1222JD	11222	1	2	1	1	0
M1222JE	11222	1	2	1	1	0
R1101JA	31101	2	1	3	2	1
R1101JA	31101	1	1	3	3	1
R1101JA	31101	1	1	3	4	1
R1101JA	31101	1	1	3	5	1
R1101JA	31101	1	1	3	6	1
R1101JA	31101	1	1	3	7	1
R1101JA	31101	1	1	3	8	1
R1101JA	31101	1	1	3	9	1
R1101JA	31101	1	1	3	10	1
R1101JA	31101	1	1	3	11	1
R1101JA	31101	1	1	3	12	1
R1101JA	31101	1	1	3	13	1
R1101JA	31101	1	1	3	14	1
R1101JA	31101	1	1	3	15	1
R1101JA	31101	1	1	3	16	1
R1101JB	31101	1	1	3	1	1
R1101JB	31101	1	1	3	2	0
R1102JA	31102	1	1	3	1	1
R1102JA	31102	1	1	3	2	0
R1102JB	31102	1	1	3	1	1
R1102JB	31102	1	1	3	2	0
R1103JA	31103	1	1	3	1	1
R1103JA	31103	1	1	3	2	1
R1103JA	31103	1	1	3	3	1
R1103JA	31103	1	1	3	4	0
R1103JB	31103	1	1	3	1	1
R1103JB	31103	1	1	3	2	1
R1103JB	31103	1	1	3	3	1
R1103JB	31103	1	1	3	4	0
R1105JB	31105	1	1	3	1	1
R1105JB	31105	1	1	3	2	1
R1105JB	31105	1	1	3	3	1
R1105JB	31105	1	1	3	4	1
R1105JB	31105	1	1	3	5	1
R1105JB	31105	1	1	3	6	1
R1105JB	31105	1	1	3	7	1
R1105JB	31105	1	1	3	8	1
R1105JB	31105	1	1	3	9	1
R1105JB	31105	1	1	3	10	1
R1105JB	31105	1	1	3	11	1
R1105JB	31105	1	1	3	12	1
R1105JB	31105	1	1	3	13	1
R1105JB	31105	1	1	3	14	1
R1105JB	31105	1	1	3	15	1
R1105JB	31105	1	1	3	17	1
R1105JB	31105	1	1	3	18	1
R1107JB	31107	1	1	3	1	1
R1107JB	31107	1	1	3	2	1
R1107JB	31107	1	1	3	3	1
R1107JB	31107	1	1	3	4	1
R1107JB	31107	1	1	3	5	1
R1107JB	31107	1	1	3	6	1
R1107JB	31107	1	1	3	7	1
R1107JB	31107	1	1	3	8	1
R1107JB	31107	1	1	3	9	1
R1107JB	31107	1	1	3	10	1
R1107JB	31107	1	1	3	11	1
R1107JB	31107	1	1	3	12	1
R1107JB	31107	1	1	3	13	1
R1107JB	31107	1	1	3	14	1
R1107JB	31107	1	1	3	15	1
R1107JB	31107	1	1	3	16	1
R1107JB	31107	1	1	3	17	1
R1127JB	31127	1	1	3	1	1
R1127JB	31127	1	1	3	2	1
R1127JB	31127	1	1	3	3	1
R1127JB	31127	1	1	3	4	1
R1127JB	31127	1	1	3	5	1
R1127JB	31127	1	1	3	6	1
R1127JB	31127	1	1	3	7	1
R1127JB	31127	1	1	3	8	1
R1127JB	31127	1	1	3	9	1
R1127JB	31127	2	1	3	11	1
R1127JB	31127	1	1	3	12	1
R1127JB	31127	1	1	3	13	1
R1127JB	31127	1	1	3	14	1
R1127JB	31127	1	1	3	15	1
R1127JB	31127	1	1	3	16	1
R1127JB	31127	1	1	3	18	0
R1128JA	31128	1	1	3	1	1
R1128JA	31128	1	1	3	2	1
R1128JA	31128	1	1	3	3	1
R1128JA	31128	1	1	3	4	1
R1128JA	31128	1	1	3	5	1
R1128JA	31128	1	1	3	6	1
R1128JA	31128	1	1	3	7	1
R1128JA	31128	1	1	3	8	1
R1128JA	31128	1	1	3	9	1
R1128JA	31128	1	1	3	10	1
R1128JA	31128	1	1	3	11	1
R1128JA	31128	1	1	3	12	1
R1128JA	31128	1	1	3	13	1
R1128JA	31128	1	1	3	14	1
R1128JA	31128	1	1	3	15	1
R1128JA	31128	1	1	3	16	1
R1128JA	31128	1	1	3	17	1
R1128JA	31128	1	1	3	18	1
R1130JA	31130	1	1	3	1	0
R1130JB	31130	1	1	3	1	0
R1132JA	31132	1	1	3	1	1
R1132JA	31132	1	1	3	2	0
R1133JA	31133	1	1	3	1	1
R1133JA	31133	1	1	3	2	1
R1133JA	31133	1	1	3	3	1
R1133JA	31133	1	1	3	4	1
R1133JA	31133	1	1	3	5	1
R1133JA	31133	1	1	3	6	1
R1133JA	31133	1	1	3	7	1
R1133JA	31133	1	1	3	8	1
R1133JA	31133	1	1	3	9	1
R1133JA	31133	1	1	3	10	1
R1133JA	31133	1	1	3	11	1
R1133JA	31133	1	1	3	12	1
R1133JA	31133	1	1	3	13	1
R1133JA	31133	1	1	3	14	1
R1133JA	31133	1	1	3	15	1
R1133JA	31133	1	1	3	16	1
R1133JA	31133	1	1	3	17	1
R1133JA	31133	2	1	3	19	1
R1133JB	31133	1	1	3	1	1
R1133JB	31133	1	1	3	2	1
R1133JB	31133	1	1	3	3	1
R1133JB	31133	2	1	3	5	1
R1133JB	31133	1	1	3	6	1
R1133JB	31133	1	1	3	7	1
R1133JB	31133	1	1	3	8	1
R1133JB	31133	1	1	3	9	1
R1133JB	31133	1	1	3	10	1
R1133JB	31133	1	1	3	11	1
R1133JB	31133	1	1	3	12	1
R1133JB	31133	1	1	3	13	1
R1133JB	31133	1	1	3	14	1
R1133JB	31133	1	1	3	15	1
R1133JB	31133	1	1	3	16	1
R1133JB	31133	1	1	3	17	1
R1133JB	31133	1	1	3	18	1
R1202JA	31202	1	2	3	1	1
R1202JA	31202	1	2	3	2	1
R1202JA	31202	1	2	3	3	1
R1202JA	31202	1	2	3	4	1
R1202JA	31202	1	2	3	5	1
R1202JA	31202	1	2	3	6	1
R1202JA	31202	1	2	3	7	1
R1202JA	31202	1	2	3	8	1
R1202JA	31202	1	2	3	9	1
R1202JA	31202	3	2	3	12	1
R1202JA	31202	3	2	3	15	1
R1202JA	31202	1	2	3	16	1
R1202JA	31202	1	2	3	17	1
R1202JA	31202	1	2	3	18	1
R1202JA	31202	1	2	3	19	1
R1202JA	31202	1	2	3	20	1
R1202JA	31202	1	2	3	21	1
R1202JA	31202	2	2	3	23	1
R1202JA	31202	1	2	3	24	1
R1202JA	31202	1	2	3	25	1
R1202JA	31202	1	2	3	26	1
R1202JA	31202	1	2	3	27	1
R1202JA	31202	1	2	3	28	1
R1202JB	31202	1	2	3	1	1
R1202JB	31202	1	2	3	2	0
R1203JA	31203	3	2	3	3	1
R1203JA	31203	1	2	3	4	1
R1203JA	31203	1	2	3	5	1
R1203JA	31203	1	2	3	6	1
R1203JA	31203	1	2	3	7	1
R1203JA	31203	1	2	3	8	1
R1203JA	31203	1	2	3	9	1
R1203JA	31203	1	2	3	10	1
R1203JA	31203	1	2	3	11	1
R1203JA	31203	1	2	3	12	1
R1203JA	31203	1	2	3	13	1
R1203JA	31203	1	2	3	14	1
R1203JA	31203	1	2	3	15	1
R1203JA	31203	1	2	3	16	1
R1203JA	31203	1	2	3	17	1
R1203JA	31203	1	2	3	18	1
R1203JA	31203	1	2	3	19	1
R1203JA	31203	1	2	3	20	1
R1203JA	31203	1	2	3	21	1
R1203JA	31203	1	2	3	22	1
R1203JA	31203	1	2	3	23	1
R1203JA	31203	1	2	3	24	1
R1203JA	31203	1	2	3	25	1
R1203JA	31203	1	2	3	26	1
R1203JB	31203	1	2	3	1	0
R1204JA	31204	1	2	3	1	1
R1204JA	31204	1	2	3	2	1
R1204JA	31204	1	2	3	3	1
R1204JA	31204	1	2	3	4	1
R1204JA	31204	3	2	3	7	1
R1204JA	31204	4	2	3	11	1
R1204JA	31204	1	2	3	12	1
R1204JA	31204	1	2	3	13	1
R1204JA	31204	1	2	3	14	1
R1204JA	31204	1	2	3	15	1
R1204JA	31204	1	2	3	16	1
R1204JA	31204	1	2	3	17	1
R1204JA	31204	1	2	3	18	1
R1204JA	31204	1	2	3	19	1
R1204JA	31204	1	2	3	20	1
R1204JA	31204	1	2	3	21	1
R1204JA	31204	1	2	3	22	1
R1204JB	31204	1	2	3	1	1
R1204JB	31204	1	2	3	2	0
R1209JA	31209	1	2	3	1	0
R1209JB	31209	3	2	3	3	1
R1209JB	31209	1	2	3	4	1
R1209JB	31209	1	2	3	5	1
R1209JB	31209	1	2	3	6	1
R1209JB	31209	1	2	3	7	1
R1209JB	31209	1	2	3	8	1
R1209JB	31209	1	2	3	9	1
R1209JB	31209	1	2	3	10	1
R1209JB	31209	1	2	3	11	1
R1209JB	31209	1	2	3	12	1
R1209JB	31209	1	2	3	13	1
R1209JB	31209	1	2	3	14	1
R1209JB	31209	1	2	3	15	1
R1209JB	31209	1	2	3	16	1
R1209JB	31209	1	2	3	17	1
R1209JB	31209	2	2	3	19	1
R1209JB	31209	1	2	3	20	1
R1209JB	31209	1	2	3	21	1
R1209JB	31209	1	2	3	22	1
R1209JB	31209	1	2	3	23	1
R1209JB	31209	1	2	3	24	1
R1209JB	31209	1	2	3	25	1
R1209JB	31209	1	2	3	26	1
R1209JC	31209	3	2	3	3	1
R1209JC	31209	1	2	3	4	1
R1209JC	31209	1	2	3	5	1
R1209JC	31209	1	2	3	6	1
R1209JC	31209	1	2	3	7	1
R1209JC	31209	1	2	3	8	1
R1209JC	31209	1	2	3	9	1
R1209JC	31209	1	2	3	10	1
R1209JC	31209	1	2	3	11	0
R1214JB	31214	1	2	3	1	0
R1217JA	31217	1	2	3	1	1
R1217JA	31217	1	2	3	2	0
R1217JB	31217	1	2	3	1	1
R1217JB	31217	1	2	3	2	1
R1217JB	31217	1	2	3	3	1
R1217JB	31217	6	2	3	9	1
R1217JB	31217	1	2	3	10	1
R1217JB	31217	1	2	3	11	1
R1217JB	31217	1	2	3	12	1
R1217JB	31217	1	2	3	13	1
R1217JB	31217	1	2	3	14	1
R1217JB	31217	1	2	3	15	1
R1217JB	31217	1	2	3	16	1
R1217JB	31217	1	2	3	17	1
R1217JB	31217	1	2	3	18	1
R1217JB	31217	1	2	3	19	1
R1217JB	31217	1	2	3	20	1
R1217JB	31217	1	2	3	21	1
R1217JB	31217	1	2	3	22	1
R1217JB	31217	1	2	3	23	1
R1217JB	31217	1	2	3	24	1
R1223JA	31223	1	2	3	1	1
R1223JA	31223	1	2	3	2	1
R1223JA	31223	1	2	3	3	1
R1223JC	31223	1	2	3	1	1
R1223JC	31223	1	2	3	2	1
R1223JC	31223	1	2	3	3	1
R1223JC	31223	1	2	3	4	1
R1223JC	31223	1	2	3	5	1
R1223JC	31223	1	2	3	6	1
R1223JC	31223	1	2	3	7	1
R1223JC	31223	1	2	3	8	1
R1223JC	31223	1	2	3	9	1
R1223JC	31223	1	2	3	10	1
R1223JC	31223	1	2	3	11	1
R1223JC	31223	1	2	3	12	1
R1223JC	31223	1	2	3	13	1
R1223JC	31223	1	2	3	14	1
R1223JC	31223	3	2	3	17	1
R1223JC	31223	3	2	3	20	1
R1223JC	31223	1	2	3	21	1
R1223JC	31223	1	2	3	22	1
R1223JC	31223	1	2	3	23	1
R1223JC	31223	1	2	3	24	1
R1223JC	31223	1	2	3	25	1
R1223JC	31223	1	2	3	26	1
R1223JC	31223	1	2	3	27	1
R1223JC	31223	1	2	3	28	1
R1223JC	31223	1	2	3	29	1
R1223JC	31223	1	2	3	30	1
R1223JC	31223	1	2	3	31	1
R1223JC	31223	1	2	3	32	1
R1223JC	31223	1	2	3	33	1
R1223JC	31223	1	2	3	34	1
R1223JC	31223	1	2	3	35	1
R1223JC	31223	1	2	3	36	1
R1223JC	31223	1	2	3	37	1
R1223JC	31223	1	2	3	38	1
R1223JC	31223	1	2	3	39	1
R1223JC	31223	1	2	3	40	1
R1223JC	31223	1	2	3	41	1
R1223JC	31223	1	2	3	42	1
R1223JC	31223	1	2	3	43	1
R1223JC	31223	1	2	3	44	1
R1223JC	31223	1	2	3	45	1
R1223JD	31223	14	2	3	14	1
R1223JD	31223	3	2	3	17	1
R1223JD	31223	3	2	3	20	1
R1223JD	31223	1	2	3	21	1
R1223JD	31223	1	2	3	22	1
R1223JD	31223	1	2	3	23	1
R1223JD	31223	1	2	3	24	1
R1223JD	31223	1	2	3	25	1
R1223JD	31223	1	2	3	26	1
R1223JD	31223	1	2	3	27	1
R1223JD	31223	1	2	3	28	1
R1223JD	31223	1	2	3	29	1
R1223JD	31223	1	2	3	30	1
R1223JD	31223	1	2	3	31	1
R1223JD	31223	1	2	3	32	1
R1223JD	31223	1	2	3	33	1
R1223JD	31223	1	2	3	34	1
R1223JD	31223	1	2	3	35	1
R1223JD	31223	1	2	3	36	1
R1223JD	31223	1	2	3	37	1
R1223JD	31223	1	2	3	38	1
R1224JA	31224	2	2	3	2	1
R1224JA	31224	1	2	3	3	1
R1224JA	31224	1	2	3	4	1
R1224JA	31224	1	2	3	5	1
R1224JA	31224	1	2	3	6	1
R1224JA	31224	1	2	3	7	1
R1224JA	31224	1	2	3	8	1
R1224JA	31224	1	2	3	9	1
R1224JA	31224	1	2	3	10	1
R1224JA	31224	1	2	3	11	1
R1224JA	31224	3	2	3	14	1
R1224JA	31224	3	2	3	17	1
R1224JA	31224	1	2	3	18	1
R1224JA	31224	1	2	3	19	1
R1224JA	31224	1	2	3	20	1
R1224JA	31224	1	2	3	21	1
R1224JA	31224	1	2	3	22	1
R1224JA	31224	1	2	3	23	1
R1224JA	31224	1	2	3	24	1
R1224JA	31224	1	2	3	25	1
R1224JA	31224	1	2	3	26	1
R1224JB	31224	2	2	3	2	1
R1224JB	31224	1	2	3	3	1
R1224JB	31224	1	2	3	4	1
R1224JB	31224	1	2	3	5	1
R1224JB	31224	1	2	3	6	1
R1224JB	31224	1	2	3	7	1
R1224JB	31224	1	2	3	8	1
R1224JB	31224	1	2	3	9	1
R1224JB	31224	1	2	3	10	1
R1224JB	31224	1	2	3	11	0
R1236JA	31236	1	2	3	1	1
R1236JA	31236	1	2	3	2	1
R1236JA	31236	1	2	3	3	1
R1236JA	31236	1	2	3	4	0
R1236JB	31236	1	2	3	1	1
R1236JB	31236	1	2	3	2	1
R1236JB	31236	1	2	3	3	1
R1236JB	31236	1	2	3	4	0
R1239JA	31239	1	2	3	1	1
R1239JA	31239	1	2	3	2	1
R1239JA	31239	1	2	3	3	1
R1239JA	31239	1	2	3	4	1
R1239JA	31239	1	2	3	5	1
R1239JA	31239	1	2	3	6	1
R1239JA	31239	1	2	3	7	1
R1239JA	31239	1	2	3	8	1
R1239JA	31239	1	2	3	9	1
R1239JA	31239	1	2	3	10	1
R1239JA	31239	1	2	3	11	1
R1239JA	31239	1	2	3	12	1
R1239JA	31239	1	2	3	13	1
R1239JA	31239	1	2	3	14	1
R1239JA	31239	1	2	3	15	1
R1239JA	31239	2	2	3	17	0
R1239JB	31239	1	2	3	1	1
R1239JB	31239	1	2	3	2	1
R1239JB	31239	1	2	3	3	1
R1239JB	31239	1	2	3	4	1
R1239JB	31239	1	2	3	5	0
R1239JC	31239	1	2	3	1	1
R1239JC	31239	1	2	3	2	1
R1239JC	31239	1	2	3	3	1
R1239JC	31239	1	2	3	4	1
R1239JC	31239	1	2	3	5	1
R1239JC	31239	1	2	3	6	1
R1239JC	31239	1	2	3	7	1
R1239JC	31239	1	2	3	8	1
R1239JC	31239	1	2	3	9	1
R1239JC	31239	1	2	3	10	1
R1239JC	31239	1	2	3	11	1
R1239JC	31239	1	2	3	12	1
R1239JC	31239	1	2	3	13	1
R1239JC	31239	1	2	3	14	1
R1239JC	31239	1	2	3	15	1
R1239JC	31239	1	2	3	16	1
R1244JA	31244	1	2	3	1	1
R1244JA	31244	1	2	3	2	1
R1244JA	31244	1	2	3	3	1
R1244JA	31244	1	2	3	4	1
R1244JA	31244	2	2	3	5	1
R1244JA	31244	1	2	3	6	1
R1244JA	31244	1	2	3	7	1
R1244JA	31244	1	2	3	8	1
R1244JA	31244	1	2	3	9	1
R1244JA	31244	1	2	3	10	1
R1244JA	31244	3	2	3	13	1
R1244JA	31244	1	2	3	16	1
R1244JA	31244	3	2	3	17	1
R1244JA	31244	1	2	3	18	1
R1244JA	31244	1	2	3	19	1
R1244JA	31244	1	2	3	20	1
R1244JA	31244	1	2	3	21	1
R1244JA	31244	1	2	3	22	1
R1244JA	31244	1	2	3	23	1
R1244JA	31244	1	2	3	24	1
R1244JA	31244	1	2	3	25	1
R1244JA	31244	1	2	3	26	1
R1244JB	31244	1	2	3	1	1
R1244JB	31244	1	2	3	2	1
R1244JB	31244	1	2	3	3	1
R1244JB	31244	1	2	3	4	1
R1244JB	31244	1	2	3	5	1
R1244JB	31244	1	2	3	6	1
R1244JB	31244	1	2	3	7	1
R1244JB	31244	1	2	3	8	1
R1244JB	31244	1	2	3	9	1
R1244JB	31244	1	2	3	10	1
R1244JB	31244	1	2	3	13	1
R1244JB	31244	1	2	3	16	1
R1244JB	31244	1	2	3	17	1
R1244JB	31244	1	2	3	18	1
R1244JB	31244	1	2	3	19	1
R1244JB	31244	1	2	3	20	1
R1244JB	31244	1	2	3	21	1
R1244JB	31244	1	2	3	22	1
R1244JB	31244	1	2	3	23	1
R1244JB	31244	1	2	3	24	1
R1244JB	31244	1	2	3	25	1
R1244JB	31244	1	2	3	26	1
R1247JB	31247	1	2	3	1	1
R1247JB	31247	1	2	3	2	1
R1247JB	31247	1	2	3	3	1
R1247JB	31247	1	2	3	4	1
R1247JB	31247	1	2	3	5	1
R1247JB	31247	6	2	3	11	1
R1247JB	31247	1	2	3	12	1
R1247JB	31247	1	2	3	13	1
R1247JB	31247	1	2	3	14	1
R1247JB	31247	1	2	3	15	1
R1247JB	31247	1	2	3	16	1
R1247JB	31247	1	2	3	17	1
R1247JB	31247	1	2	3	18	1
R1247JB	31247	1	2	3	19	1
R1247JB	31247	1	2	3	20	0
R1261JA	31261	1	2	3	1	1
R1261JA	31261	1	2	3	2	1
R1261JA	31261	1	2	3	3	1
R1261JA	31261	1	2	3	4	1
R1261JA	31261	1	2	3	5	1
R1261JA	31261	1	2	3	6	1
R1261JA	31261	1	2	3	7	1
R1261JA	31261	1	2	3	8	1
R1261JA	31261	1	2	3	9	1
R1261JA	31261	1	2	3	10	1
R1261JA	31261	1	2	3	11	1
R1261JA	31261	7	2	3	18	1
R1261JA	31261	1	2	3	19	1
R1261JA	31261	1	2	3	20	1
R1261JA	31261	1	2	3	21	1
R1261JA	31261	1	2	3	22	1
R1261JA	31261	1	2	3	23	1
R1261JA	31261	1	2	3	24	1
R1261JA	31261	1	2	3	25	1
R1261JA	31261	1	2	3	26	1
R1261JA	31261	1	2	3	27	1
R1261JA	31261	1	2	3	28	1
R1261JA	31261	1	2	3	29	1
R1261JB	31261	1	2	3	1	1
R1261JB	31261	1	2	3	2	1
R1261JB	31261	1	2	3	3	1
R1261JB	31261	1	2	3	4	1
R1261JB	31261	1	2	3	5	1
R1261JB	31261	1	2	3	6	1
R1261JB	31261	1	2	3	7	1
R1261JB	31261	1	2	3	8	1
R1261JB	31261	1	2	3	9	1
R1261JB	31261	1	2	3	10	1
R1261JB	31261	1	2	3	11	1
R1261JB	31261	1	2	3	12	0
T1101JA	21101	1	1	2	1	1
T1101JA	21101	1	1	2	2	1
T1101JA	21101	1	1	2	3	1
T1101JA	21101	1	1	2	4	1
T1101JA	21101	1	1	2	5	1
T1101JA	21101	1	1	2	6	1
T1101JA	21101	1	1	2	7	1
T1101JA	21101	1	1	2	8	1
T1101JA	21101	1	1	2	9	1
T1101JA	21101	1	1	2	10	1
T1101JA	21101	1	1	2	11	1
T1101JA	21101	1	1	2	12	1
T1101JB	21101	1	1	2	1	1
T1101JB	21101	1	1	2	2	1
T1101JB	21101	1	1	2	3	0
T1101JC	21101	1	1	2	1	1
T1101JC	21101	1	1	2	2	1
T1101JC	21101	1	1	2	3	1
T1101JC	21101	1	1	2	4	1
T1101JC	21101	1	1	2	5	1
T1101JC	21101	1	1	2	6	1
T1101JC	21101	1	1	2	7	1
T1101JC	21101	1	1	2	8	1
T1101JC	21101	1	1	2	9	1
T1104J	21104	1	1	2	1	1
T1104J	21104	1	1	2	2	1
T1104J	21104	1	1	2	3	1
T1104J	21104	1	1	2	4	1
T1104J	21104	1	1	2	5	1
T1104J	21104	1	1	2	6	1
T1104J	21104	1	1	2	7	1
T1104J	21104	1	1	2	8	1
T1104J	21104	1	1	2	9	1
T1104J	21104	1	1	2	10	1
T1104J	21104	1	1	2	11	1
T1104J	21104	1	1	2	12	1
T1104J	21104	1	1	2	13	1
T1104J	21104	1	1	2	14	1
T1107J	21107	1	1	2	1	1
T1107J	21107	1	1	2	2	1
T1107J	21107	1	1	2	3	1
T1107J	21107	1	1	2	4	1
T1107J	21107	1	1	2	5	1
T1107J	21107	1	1	2	6	1
T1107J	21107	2	1	2	8	1
T1107J	21107	1	1	2	9	1
T1107J	21107	4	1	2	13	1
T1107J	21107	1	1	2	14	1
T1107J	21107	1	1	2	15	1
T1107J	21107	1	1	2	16	1
T1107J	21107	1	1	2	17	1
T1107J	21107	1	1	2	18	1
T1107J	21107	1	1	2	19	1
T1109J	21109	1	1	2	1	1
T1109J	21109	1	1	2	2	1
T1109J	21109	1	1	2	3	1
T1109J	21109	1	1	2	4	1
T1109J	21109	1	1	2	5	1
T1109J	21109	1	1	2	6	1
T1109J	21109	1	1	2	7	1
T1109J	21109	1	1	2	8	1
T1109J	21109	1	1	2	9	1
T1109J	21109	1	1	2	10	1
T1109J	21109	1	1	2	11	1
T1109J	21109	1	1	2	12	1
T1109J	21109	1	1	2	13	1
T1109J	21109	1	1	2	14	1
T1109J	21109	1	1	2	15	1
T1109J	21109	1	1	2	16	1
T1109J	21109	1	1	2	17	1
T1110J	21110	1	1	2	1	1
T1110J	21110	1	1	2	2	1
T1110J	21110	1	1	2	3	1
T1110J	21110	1	1	2	4	1
T1110J	21110	1	1	2	5	1
T1110J	21110	1	1	2	6	1
T1110J	21110	1	1	2	7	1
T1110J	21110	1	1	2	8	1
T1110J	21110	1	1	2	9	1
T1110J	21110	1	1	2	10	1
T1110J	21110	1	1	2	11	1
T1110J	21110	1	1	2	12	1
T1110J	21110	1	1	2	13	1
T1110J	21110	1	1	2	14	1
T1110J	21110	1	1	2	15	1
T1110J	21110	1	1	2	16	1
T1110J	21110	1	1	2	17	1
T1112J	21112	1	1	2	1	1
T1112J	21112	1	1	2	2	1
T1112J	21112	1	1	2	3	1
T1112J	21112	1	1	2	4	0
T1115JA	21115	1	1	2	1	1
T1115JA	21115	1	1	2	2	1
T1115JA	21115	1	1	2	3	1
T1115JA	21115	1	1	2	4	1
T1115JA	21115	1	1	2	5	1
T1115JA	21115	1	1	2	6	1
T1115JA	21115	1	1	2	7	1
T1115JA	21115	1	1	2	8	1
T1115JA	21115	1	1	2	9	1
T1115JA	21115	1	1	2	10	1
T1115JA	21115	1	1	2	11	1
T1115JA	21115	1	1	2	12	1
T1115JA	21115	1	1	2	13	1
T1115JA	21115	1	1	2	14	1
T1115JA	21115	1	1	2	15	1
T1115JB	21115	1	1	2	1	1
T1115JB	21115	1	1	2	2	1
T1115JB	21115	1	1	2	3	1
T1115JB	21115	1	1	2	4	1
T1115JB	21115	1	1	2	5	1
T1115JB	21115	1	1	2	6	1
T1115JB	21115	1	1	2	7	1
T1115JB	21115	1	1	2	8	1
T1115JB	21115	1	1	2	9	1
T1115JB	21115	1	1	2	10	1
T1115JB	21115	1	1	2	11	1
T1115JB	21115	1	1	2	12	1
T1115JB	21115	1	1	2	13	1
T1115JB	21115	1	1	2	14	1
T1115JB	21115	1	1	2	15	1
T1129JA	21129	1	1	2	1	1
T1129JA	21129	1	1	2	2	1
T1129JA	21129	1	1	2	3	1
T1129JA	21129	2	1	2	5	1
T1129JA	21129	1	1	2	6	1
T1129JA	21129	1	1	2	7	1
T1129JA	21129	1	1	2	8	1
T1129JA	21129	1	1	2	9	1
T1129JA	21129	1	1	2	10	1
T1129JA	21129	1	1	2	11	1
T1129JA	21129	1	1	2	12	0
T1130JA	21130	1	1	2	1	1
T1130JA	21130	1	1	2	2	1
T1130JA	21130	1	1	2	3	1
T1130JA	21130	1	1	2	4	1
T1130JA	21130	1	1	2	5	1
T1130JA	21130	1	1	2	6	1
T1130JA	21130	1	1	2	7	1
T1130JA	21130	1	1	2	8	1
T1130JA	21130	1	1	2	9	1
T1130JA	21130	1	1	2	10	1
T1130JA	21130	1	1	2	11	1
T1130JA	21130	1	1	2	12	1
T1130JA	21130	1	1	2	13	1
T1130JA	21130	1	1	2	14	1
T1130JA	21130	1	1	2	15	1
T1130JA	21130	1	1	2	16	1
T1130JA	21130	1	1	2	17	1
T1133JA	21133	1	1	2	1	1
T1133JA	21133	1	1	2	2	1
T1133JA	21133	1	1	2	3	1
T1133JA	21133	1	1	2	4	1
T1133JA	21133	1	1	2	5	1
T1133JA	21133	1	1	2	6	1
T1133JA	21133	1	1	2	7	1
T1133JA	21133	1	1	2	8	1
T1133JA	21133	1	1	2	9	1
T1133JA	21133	1	1	2	10	1
T1133JA	21133	1	1	2	11	1
T1133JA	21133	1	1	2	12	1
T1133JA	21133	1	1	2	13	1
T1133JA	21133	1	1	2	14	1
T1133JA	21133	1	1	2	15	1
T1133JA	21133	2	1	2	17	1
T1133JB	21133	1	1	2	1	1
T1133JB	21133	1	1	2	2	1
T1133JB	21133	1	1	2	3	1
T1133JB	21133	1	1	2	4	1
T1133JB	21133	1	1	2	5	1
T1133JB	21133	1	1	2	6	1
T1133JB	21133	1	1	2	7	1
T1133JB	21133	1	1	2	8	1
T1133JB	21133	1	1	2	9	1
T1133JB	21133	1	1	2	10	1
T1133JB	21133	1	1	2	11	1
T1133JB	21133	1	1	2	12	1
T1133JB	21133	1	1	2	13	1
T1133JB	21133	1	1	2	14	1
T1133JB	21133	1	1	2	15	1
T1133JB	21133	1	1	2	16	1
T1133JB	21133	1	1	2	17	1
T1135J	21135	1	1	2	1	1
T1135J	21135	1	1	2	2	0
T1146J	21146	1	1	2	1	1
T1146J	21146	1	1	2	2	1
T1146J	21146	1	1	2	3	1
T1146J	21146	1	1	2	4	1
T1146J	21146	1	1	2	5	1
T1146J	21146	1	1	2	6	1
T1146J	21146	1	1	2	7	1
T1146J	21146	1	1	2	8	1
T1146J	21146	1	1	2	9	1
T1147JB	21147	1	1	2	1	1
T1147JB	21147	1	1	2	2	1
T1147JB	21147	1	1	2	3	1
T1147JB	21147	1	1	2	4	1
T1147JB	21147	1	1	2	5	1
T1147JC	21147	1	1	2	1	1
T1147JC	21147	1	1	2	2	1
T1147JC	21147	1	1	2	3	1
T1147JC	21147	1	1	2	4	1
T1147JC	21147	1	1	2	5	1
T1147JC	21147	1	1	2	6	1
T1147JC	21147	1	1	2	7	1
T1147JC	21147	1	1	2	8	1
T1147JC	21147	1	1	2	9	1
T1147JC	21147	1	1	2	10	1
T1147JC	21147	1	1	2	11	1
T1147JC	21147	1	1	2	12	1
T1147JC	21147	1	1	2	13	1
T1147JC	21147	1	1	2	14	1
T1147JC	21147	1	1	2	15	1
T1147JC	21147	1	1	2	16	1
T1147JC	21147	1	1	2	17	1
T1149J	21149	1	1	2	1	1
T1149J	21149	1	1	2	2	0
T1150JA	21150	1	1	2	1	1
T1150JA	21150	1	1	2	2	1
T1150JA	21150	1	1	2	3	1
T1150JA	21150	1	1	2	4	1
T1150JA	21150	1	1	2	5	1
T1150JA	21150	1	1	2	6	1
T1150JA	21150	1	1	2	7	1
T1150JA	21150	1	1	2	8	1
T1150JA	21150	1	1	2	9	1
T1150JA	21150	1	1	2	10	1
T1150JA	21150	1	1	2	11	1
T1150JA	21150	1	1	2	12	1
T1150JA	21150	1	1	2	13	1
T1150JA	21150	1	1	2	14	1
T1150JA	21150	1	1	2	15	1
T1150JB	21150	1	1	2	1	1
T1150JB	21150	1	1	2	2	1
T1150JB	21150	1	1	2	3	1
T1150JB	21150	1	1	2	4	1
T1150JB	21150	1	1	2	5	1
T1150JB	21150	1	1	2	6	1
T1151J	21151	1	1	2	1	1
T1151J	21151	1	1	2	2	1
T1151J	21151	1	1	2	3	1
T1151J	21151	1	1	2	4	1
T1151J	21151	1	1	2	5	1
T1151J	21151	1	1	2	6	1
T1151J	21151	1	1	2	7	1
T1151J	21151	1	1	2	8	1
T1151J	21151	1	1	2	9	1
T1155J	21155	1	1	2	1	0
T1168J	21168	1	1	2	1	1
T1168J	21168	1	1	2	2	1
T1168J	21168	1	1	2	3	1
T1168J	21168	1	1	2	4	1
T1168J	21168	1	1	2	5	1
T1168J	21168	1	1	2	6	1
T1168J	21168	1	1	2	7	1
T1168J	21168	1	1	2	8	1
T1168J	21168	1	1	2	9	1
T1168J	21168	1	1	2	10	1
T1168J	21168	1	1	2	11	1
T1168J	21168	1	1	2	12	1
T1168J	21168	1	1	2	13	1
T1168J	21168	1	1	2	14	1
T1168J	21168	1	1	2	15	1
T1168J	21168	1	1	2	16	1
T1168J	21168	1	1	2	17	1
T1169J	21169	1	1	2	1	1
T1169J	21169	1	1	2	2	0
T1177J	21177	1	1	2	1	1
T1177J	21177	1	1	2	2	1
T1177J	21177	1	1	2	3	1
T1177J	21177	1	1	2	4	1
T1177J	21177	1	1	2	5	1
T1177J	21177	1	1	2	6	1
T1177J	21177	1	1	2	7	1
T1177J	21177	1	1	2	8	1
T1177J	21177	2	1	2	10	1
T1177J	21177	1	1	2	11	1
T1177J	21177	1	1	2	12	1
T1177J	21177	1	1	2	13	1
T1177J	21177	1	1	2	14	1
T1177J	21177	1	1	2	15	1
T1177J	21177	1	1	2	16	1
T1177J	21177	1	1	2	17	1
T1177J	21177	1	1	2	18	1
T1177J	21177	1	1	2	19	1
T1177J	21177	1	1	2	20	1
T1177J	21177	1	1	2	21	1
T1177J	21177	1	1	2	22	1
T1204JA	21204	1	2	2	1	1
T1204JA	21204	1	2	2	2	1
T1204JA	21204	1	2	2	3	1
T1204JA	21204	1	2	2	4	1
T1204JA	21204	1	2	2	5	1
T1204JA	21204	2	2	2	7	1
T1204JA	21204	1	2	2	8	1
T1204JA	21204	1	2	2	9	1
T1204JA	21204	1	2	2	10	1
T1204JA	21204	1	2	2	11	1
T1204JA	21204	1	2	2	12	1
T1204JA	21204	1	2	2	13	1
T1204JA	21204	1	2	2	14	1
T1204JA	21204	1	2	2	15	1
T1204JA	21204	1	2	2	16	1
T1204JA	21204	1	2	2	17	1
T1204JA	21204	1	2	2	18	1
T1204JA	21204	1	2	2	19	1
T1204JA	21204	1	2	2	20	1
T1204JA	21204	1	2	2	21	1
T1204JA	21204	1	2	2	22	1
T1204JA	21204	2	2	2	24	1
T1204JA	21204	1	2	2	25	1
T1204JA	21204	1	2	2	26	1
T1204JA	21204	1	2	2	27	1
T1204JA	21204	1	2	2	28	1
T1204JA	21204	1	2	2	29	1
T1204JA	21204	1	2	2	30	1
T1204JB	21204	1	2	2	1	0
T1204JD	21204	1	2	2	1	0
T1204JE	21204	1	2	2	1	0
T12102JA	212102	1	2	2	1	1
T12102JA	212102	1	2	2	2	1
T12102JA	212102	1	2	2	3	1
T12102JA	212102	1	2	2	4	1
T12102JA	212102	1	2	2	5	1
T12102JA	212102	1	2	2	6	1
T12102JA	212102	1	2	2	7	1
T12102JA	212102	1	2	2	8	1
T12102JA	212102	1	2	2	9	1
T12102JA	212102	1	2	2	10	1
T12102JA	212102	1	2	2	11	1
T12102JA	212102	1	2	2	12	1
T12102JA	212102	1	2	2	13	1
T12102JA	212102	1	2	2	14	1
T12102JA	212102	1	2	2	15	1
T12102JA	212102	2	2	2	17	1
T12102JA	212102	1	2	2	18	1
T12102JA	212102	1	2	2	19	1
T12102JA	212102	1	2	2	20	1
T12102JA	212102	1	2	2	21	1
T12102JA	212102	1	2	2	22	1
T12102JA	212102	1	2	2	23	1
T12102JA	212102	1	2	2	24	1
T12102JA	212102	1	2	2	25	1
T12102JA	212102	1	2	2	26	1
T12102JA	212102	1	2	2	27	1
T12102JA	212102	1	2	2	28	1
T12102JA	212102	1	2	2	29	1
T12102JB	212102	1	2	2	1	1
T12102JB	212102	1	2	2	2	0
T12103J	212103	1	2	2	1	0
T12104JA	212104	1	2	2	1	0
T12104JB	212104	1	2	2	1	1
T12104JB	212104	1	2	2	2	1
T12104JB	212104	1	2	2	3	1
T12104JB	212104	1	2	2	4	1
T12104JB	212104	1	2	2	5	1
T12104JB	212104	1	2	2	6	1
T12104JB	212104	1	2	2	7	1
T12104JB	212104	1	2	2	8	1
T12104JB	212104	1	2	2	9	0
T12104JC	212104	1	2	2	1	1
T12104JC	212104	1	2	2	2	1
T12104JC	212104	1	2	2	3	1
T12104JC	212104	1	2	2	4	1
T12104JC	212104	1	2	2	5	1
T12104JC	212104	2	2	2	7	1
T12104JC	212104	1	2	2	8	1
T12104JC	212104	1	2	2	9	1
T12104JC	212104	1	2	2	10	1
T12104JC	212104	1	2	2	11	1
T12104JC	212104	1	2	2	12	1
T12104JC	212104	1	2	2	13	1
T12104JC	212104	1	2	2	14	1
T12104JC	212104	1	2	2	15	1
T12104JC	212104	1	2	2	16	1
T12104JC	212104	1	2	2	17	1
T12105J	212105	1	2	2	1	1
T12105J	212105	1	2	2	2	1
T12105J	212105	1	2	2	3	1
T12105J	212105	1	2	2	4	1
T12105J	212105	1	2	2	5	1
T12105J	212105	1	2	2	6	1
T12105J	212105	2	2	2	8	1
T12105J	212105	1	2	2	9	1
T12105J	212105	1	2	2	10	1
T12105J	212105	1	2	2	11	1
T12105J	212105	1	2	2	12	1
T12105J	212105	1	2	2	13	1
T12105J	212105	1	2	2	14	1
T12105J	212105	1	2	2	15	1
T12105J	212105	1	2	2	16	1
T12105J	212105	1	2	2	17	1
T12105J	212105	1	2	2	18	1
T12105J	212105	1	2	2	19	1
T12105J	212105	1	2	2	20	1
T12105J	212105	1	2	2	21	1
T12105J	212105	1	2	2	22	1
T12105J	212105	1	2	2	23	1
T12105J	212105	2	2	2	25	1
T12105J	212105	1	2	2	26	1
T12107JA	212107	1	2	2	1	1
T12107JA	212107	8	2	2	9	1
T12107JA	212107	8	2	2	17	1
T12107JA	212107	1	2	2	18	1
T12107JA	212107	1	2	2	19	1
T12107JA	212107	1	2	2	20	1
T12107JA	212107	1	2	2	21	1
T12107JA	212107	1	2	2	22	1
T12107JA	212107	1	2	2	23	1
T12107JA	212107	2	2	2	25	1
T12107JA	212107	1	2	2	26	1
T12107JA	212107	1	2	2	27	1
T12107JA	212107	1	2	2	28	1
T12107JA	212107	1	2	2	29	1
T12107JA	212107	1	2	2	30	1
T12107JB	212107	1	2	2	1	1
T12107JB	212107	1	2	2	2	1
T12107JB	212107	1	2	2	3	1
T12107JB	212107	1	2	2	4	1
T12107JB	212107	1	2	2	5	1
T12107JB	212107	1	2	2	6	1
T12107JB	212107	1	2	2	8	1
T12107JB	212107	1	2	2	9	1
T12107JB	212107	1	2	2	10	1
T12107JB	212107	1	2	2	11	1
T12107JB	212107	1	2	2	12	1
T12107JB	212107	1	2	2	13	1
T12107JB	212107	1	2	2	14	1
T12107JB	212107	1	2	2	15	1
T12107JB	212107	1	2	2	16	1
T12107JB	212107	1	2	2	17	1
T12107JB	212107	1	2	2	18	1
T12107JB	212107	1	2	2	19	1
T12107JB	212107	1	2	2	20	1
T12107JB	212107	1	2	2	21	1
T12107JB	212107	1	2	2	22	1
T12107JB	212107	1	2	2	23	1
T12107JB	212107	1	2	2	25	1
T12107JB	212107	1	2	2	26	1
T12107JB	212107	1	2	2	27	1
T12115JB	212115	1	2	2	1	1
T12115JB	212115	1	2	2	2	1
T12115JB	212115	1	2	2	3	1
T12115JB	212115	1	2	2	4	1
T12115JB	212115	1	2	2	5	1
T12115JB	212115	1	2	2	6	1
T12115JB	212115	1	2	2	7	1
T12115JB	212115	1	2	2	8	1
T12115JB	212115	1	2	2	9	1
T12115JB	212115	1	2	2	10	1
T12115JB	212115	2	2	2	12	1
T12115JB	212115	1	2	2	13	1
T12115JB	212115	1	2	2	14	1
T12115JB	212115	1	2	2	15	1
T12115JB	212115	1	2	2	16	1
T12115JB	212115	1	2	2	17	1
T12115JB	212115	1	2	2	18	1
T12115JB	212115	1	2	2	19	1
T12115JB	212115	1	2	2	20	1
T12115JB	212115	1	2	2	21	1
T12115JB	212115	1	2	2	22	1
T12115JB	212115	1	2	2	23	1
T12115JB	212115	1	2	2	24	1
T12115JB	212115	1	2	2	25	1
T12115JB	212115	1	2	2	26	1
T12115JB	212115	1	2	2	27	1
T12115JB	212115	2	2	2	29	1
T12115JB	212115	1	2	2	30	1
T12116JA	212116	1	2	2	1	1
T12116JA	212116	1	2	2	2	1
T12116JA	212116	1	2	2	3	1
T12116JA	212116	1	2	2	4	1
T12116JA	212116	1	2	2	5	1
T12116JA	212116	1	2	2	6	1
T12116JA	212116	1	2	2	7	1
T12116JA	212116	1	2	2	8	1
T12116JA	212116	1	2	2	9	1
T12116JA	212116	1	2	2	10	1
T12116JA	212116	1	2	2	11	1
T12116JA	212116	1	2	2	12	1
T12116JA	212116	1	2	2	13	1
T12116JA	212116	1	2	2	14	1
T12116JA	212116	1	2	2	15	1
T12116JA	212116	1	2	2	16	1
T12116JA	212116	1	2	2	17	1
T12116JA	212116	1	2	2	18	1
T12116JA	212116	2	2	2	20	1
T12116JA	212116	1	2	2	21	1
T12116JA	212116	1	2	2	22	1
T12116JA	212116	1	2	2	23	1
T12116JA	212116	1	2	2	24	1
T12116JA	212116	1	2	2	25	1
T12116JA	212116	1	2	2	26	1
T12116JA	212116	1	2	2	27	1
T12116JA	212116	2	2	2	29	1
T12116JB	212116	1	2	2	1	1
T12116JB	212116	1	2	2	2	1
T12116JB	212116	1	2	2	3	1
T12116JB	212116	1	2	2	4	1
T12116JB	212116	1	2	2	5	1
T12116JB	212116	1	2	2	6	1
T12116JB	212116	1	2	2	7	1
T12116JB	212116	1	2	2	8	1
T12116JB	212116	1	2	2	9	1
T12116JB	212116	1	2	2	10	1
T12116JB	212116	2	2	2	12	1
T12116JB	212116	1	2	2	13	1
T12116JB	212116	1	2	2	14	1
T12116JB	212116	1	2	2	15	1
T12116JB	212116	1	2	2	16	1
T12116JB	212116	1	2	2	17	1
T12116JB	212116	1	2	2	18	1
T12116JB	212116	1	2	2	19	1
T12116JB	212116	1	2	2	20	1
T12116JB	212116	1	2	2	21	1
T12116JB	212116	1	2	2	22	1
T12116JB	212116	1	2	2	23	1
T12116JB	212116	1	2	2	24	1
T12116JB	212116	1	2	2	25	1
T12116JB	212116	1	2	2	26	1
T12116JB	212116	1	2	2	27	1
T12116JB	212116	2	2	2	29	1
T12117JA	212117	1	2	2	1	1
T12117JA	212117	1	2	2	2	1
T12117JA	212117	1	2	2	3	1
T12117JA	212117	1	2	2	4	1
T12117JA	212117	1	2	2	5	1
T12117JA	212117	1	2	2	6	1
T12117JA	212117	1	2	2	8	1
T12117JA	212117	1	2	2	9	1
T12117JA	212117	1	2	2	10	0
T12120JA	212120	1	2	2	1	1
T12120JA	212120	1	2	2	2	1
T12120JA	212120	1	2	2	3	1
T12120JA	212120	1	2	2	4	1
T12120JA	212120	1	2	2	5	1
T12120JA	212120	2	2	2	7	1
T12120JA	212120	1	2	2	8	1
T12120JA	212120	1	2	2	9	1
T12120JA	212120	1	2	2	10	1
T12120JA	212120	1	2	2	11	1
T12120JA	212120	1	2	2	12	1
T12120JA	212120	1	2	2	13	1
T12120JA	212120	1	2	2	14	1
T12120JA	212120	1	2	2	15	1
T12120JA	212120	1	2	2	16	1
T12120JA	212120	1	2	2	17	1
T12120JA	212120	1	2	2	18	1
T12120JA	212120	1	2	2	19	1
T12120JB	212120	1	2	2	1	0
T12122JA	212122	1	2	2	1	0
T12122JB	212122	1	2	2	1	0
T12122JC	212122	1	2	2	1	1
T12122JC	212122	1	2	2	2	1
T12122JC	212122	1	2	2	3	1
T12122JC	212122	1	2	2	4	1
T12122JC	212122	1	2	2	5	1
T12122JC	212122	1	2	2	6	1
T12122JC	212122	1	2	2	7	1
T12122JC	212122	1	2	2	8	1
T12122JC	212122	1	2	2	9	1
T12122JC	212122	1	2	2	10	1
T12122JC	212122	1	2	2	11	1
T12122JC	212122	1	2	2	12	1
T12122JC	212122	1	2	2	13	1
T12122JC	212122	1	2	2	14	1
T12122JC	212122	1	2	2	15	1
T12122JC	212122	2	2	2	17	1
T12122JC	212122	1	2	2	18	1
T12122JC	212122	1	2	2	19	1
T12122JC	212122	1	2	2	20	1
T12122JC	212122	1	2	2	21	1
T12122JC	212122	1	2	2	22	1
T12122JC	212122	1	2	2	23	1
T12122JC	212122	1	2	2	24	1
T12122JC	212122	1	2	2	25	1
T12122JC	212122	1	2	2	26	1
T12122JC	212122	1	2	2	27	1
T12122JC	212122	1	2	2	28	1
T12122JC	212122	1	2	2	29	1
T12126JA	212126	1	2	2	1	1
T12126JA	212126	1	2	2	2	1
T12126JA	212126	1	2	2	3	1
T12126JA	212126	1	2	2	4	1
T12126JA	212126	1	2	2	5	1
T12126JA	212126	1	2	2	6	1
T12126JA	212126	1	2	2	7	1
T12126JA	212126	1	2	2	8	1
T12126JA	212126	1	2	2	9	1
T12126JB	212126	1	2	2	1	0
T12126JC	212126	1	2	2	1	0
T1212JA	21212	1	2	2	1	0
T1212JB	21212	1	2	2	2	0
T1217JA	21217	1	2	2	1	1
T1217JA	21217	1	2	2	2	1
T1217JA	21217	1	2	2	3	1
T1217JA	21217	1	2	2	4	1
T1217JA	21217	1	2	2	5	1
T1217JA	21217	1	2	2	6	1
T1217JA	21217	1	2	2	7	1
T1217JA	21217	1	2	2	8	1
T1217JA	21217	1	2	2	9	1
T1217JA	21217	1	2	2	10	1
T1217JA	21217	1	2	2	11	1
T1217JA	21217	1	2	2	12	1
T1217JA	21217	1	2	2	13	1
T1217JA	21217	1	2	2	14	1
T1217JA	21217	1	2	2	15	1
T1217JA	21217	1	2	2	16	1
T1217JA	21217	1	2	2	17	1
T1217JA	21217	1	2	2	18	1
T1217JA	21217	1	2	2	20	1
T1217JA	21217	1	2	2	21	1
T1217JA	21217	1	2	2	22	1
T1217JA	21217	1	2	2	23	1
T1217JA	21217	1	2	2	24	1
T1217JA	21217	1	2	2	25	1
T1217JA	21217	2	2	2	27	1
T1217JB	21217	1	2	2	1	1
T1217JB	21217	1	2	2	2	1
T1217JB	21217	1	2	2	3	0
T1222J	21222	1	2	2	1	0
T1222JB	21222	1	2	2	1	1
T1222JB	21222	1	2	2	2	1
T1222JB	21222	1	2	2	3	1
T1222JB	21222	1	2	2	4	1
T1222JB	21222	2	2	2	6	1
T1222JB	21222	1	2	2	7	1
T1222JB	21222	1	2	2	8	1
T1222JB	21222	1	2	2	9	1
T1222JB	21222	1	2	2	10	1
T1222JB	21222	1	2	2	11	1
T1222JB	21222	1	2	2	12	1
T1222JB	21222	1	2	2	13	1
T1222JB	21222	1	2	2	14	1
T1222JB	21222	1	2	2	15	1
T1222JB	21222	1	2	2	16	1
T1222JB	21222	1	2	2	17	1
T1222JB	21222	1	2	2	18	1
T1222JB	21222	1	2	2	19	1
T1222JB	21222	1	2	2	20	1
T1222JB	21222	1	2	2	21	1
T1222JB	21222	2	2	2	23	1
T1222JB	21222	1	2	2	24	1
T1222JB	21222	1	2	2	25	1
T1222JB	21222	1	2	2	26	1
T1226JA	21226	1	2	2	1	1
T1226JA	21226	1	2	2	2	1
T1226JA	21226	1	2	2	3	1
T1226JA	21226	2	2	2	5	1
T1226JA	21226	1	2	2	6	1
T1226JA	21226	1	2	2	7	1
T1226JA	21226	1	2	2	8	1
T1226JA	21226	1	2	2	9	1
T1226JA	21226	1	2	2	10	1
T1226JA	21226	1	2	2	11	1
T1226JA	21226	1	2	2	12	1
T1226JA	21226	1	2	2	13	1
T1226JA	21226	1	2	2	14	1
T1226JA	21226	1	2	2	15	1
T1226JA	21226	1	2	2	16	1
T1226JA	21226	1	2	2	17	1
T1226JA	21226	1	2	2	18	1
T1226JA	21226	1	2	2	19	1
T1226JA	21226	1	2	2	20	1
T1226JA	21226	2	2	2	22	1
T1226JA	21226	1	2	2	23	1
T1226JA	21226	1	2	2	24	1
T1226JA	21226	1	2	2	25	1
T1226JA	21226	1	2	2	26	1
T1226JA	21226	1	2	2	27	1
T1226JA	21226	1	2	2	28	1
T1226JA	21226	1	2	2	29	1
T1226JB	21226	1	2	2	1	1
T1226JB	21226	1	2	2	2	1
T1226JB	21226	1	2	2	3	1
T1226JB	21226	2	2	2	5	1
T1226JB	21226	1	2	2	6	1
T1226JB	21226	1	2	2	7	1
T1226JB	21226	1	2	2	8	1
T1226JB	21226	1	2	2	9	1
T1226JB	21226	1	2	2	10	1
T1226JB	21226	1	2	2	11	1
T1226JB	21226	1	2	2	12	1
T1226JB	21226	1	2	2	13	1
T1226JB	21226	1	2	2	14	1
T1226JB	21226	1	2	2	15	1
T1226JB	21226	1	2	2	16	1
T1226JB	21226	1	2	2	17	1
T1226JB	21226	1	2	2	18	1
T1226JB	21226	1	2	2	19	1
T1226JB	21226	1	2	2	20	1
T1226JB	21226	2	2	2	22	1
T1226JB	21226	1	2	2	23	1
T1226JB	21226	1	2	2	24	1
T1226JB	21226	1	2	2	25	1
T1226JB	21226	1	2	2	26	1
T1226JB	21226	1	2	2	27	1
T1226JB	21226	1	2	2	28	1
T1226JB	21226	1	2	2	29	1
T1226JB	21226	1	2	2	30	1
T1226JB	21226	1	2	2	31	1
T1226JB	21226	1	2	2	32	1
T1226JB	21226	1	2	2	33	1
T1232JA	21232	1	2	2	1	0
T1232JB	21232	1	2	2	1	1
T1232JB	21232	1	2	2	2	1
T1232JB	21232	1	2	2	3	1
T1232JB	21232	2	2	2	5	1
T1232JB	21232	1	2	2	6	1
T1232JB	21232	1	2	2	7	1
T1232JB	21232	1	2	2	8	1
T1232JB	21232	1	2	2	9	1
T1232JB	21232	1	2	2	10	1
T1232JB	21232	1	2	2	11	1
T1232JB	21232	1	2	2	12	1
T1232JB	21232	1	2	2	13	1
T1232JB	21232	1	2	2	14	1
T1232JB	21232	1	2	2	15	1
T1232JB	21232	1	2	2	16	1
T1232JB	21232	1	2	2	17	1
T1232JB	21232	1	2	2	18	1
T1232JB	21232	1	2	2	19	1
T1232JB	21232	1	2	2	20	1
T1232JB	21232	2	2	2	22	1
T1232JB	21232	1	2	2	23	1
T1232JB	21232	1	2	2	24	1
T1232JB	21232	1	2	2	25	1
T1232JB	21232	1	2	2	26	1
T1232JB	21232	1	2	2	27	1
T1232JB	21232	2	2	2	29	1
T1232JB	21232	1	2	2	30	1
T1232JB	21232	1	2	2	31	1
T1234JA	21234	1	2	2	1	0
T1234JB	21234	1	2	2	1	0
T1235JA	21235	1	2	2	1	1
T1235JA	21235	1	2	2	2	1
T1235JA	21235	1	2	2	3	1
T1235JA	21235	1	2	2	4	1
T1235JA	21235	1	2	2	5	1
T1235JA	21235	1	2	2	7	1
T1235JA	21235	1	2	2	8	1
T1235JA	21235	1	2	2	9	1
T1235JA	21235	1	2	2	10	1
T1235JA	21235	1	2	2	11	1
T1235JA	21235	1	2	2	12	1
T1236JA	21236	1	2	2	5	1
T1236JA	21236	1	2	2	6	1
T1236JA	21236	1	2	2	7	1
T1236JA	21236	1	2	2	8	1
T1236JA	21236	1	2	2	9	1
T1236JA	21236	1	2	2	10	1
T1236JA	21236	1	2	2	11	1
T1236JA	21236	1	2	2	13	1
T1236JA	21236	1	2	2	14	1
T1236JA	21236	1	2	2	15	1
T1236JA	21236	1	2	2	16	1
T1236JA	21236	1	2	2	17	1
T1236JA	21236	1	2	2	18	1
T1236JA	21236	1	2	2	19	1
T1236JA	21236	1	2	2	20	1
T1236JA	21236	1	2	2	21	1
T1236JA	21236	1	2	2	22	1
T1236JA	21236	1	2	2	23	1
T1236JA	21236	1	2	2	24	1
T1236JA	21236	1	2	2	25	1
T1236JA	21236	1	2	2	26	1
T1236JA	21236	1	2	2	27	1
T1236JA	21236	1	2	2	28	1
T1236JA	21236	1	2	2	29	1
T1236JC	21236	1	2	2	1	1
T1236JC	21236	1	2	2	2	1
T1236JC	21236	1	2	2	3	1
T1236JC	21236	1	2	2	4	1
T1236JC	21236	1	2	2	5	1
T1236JC	21236	1	2	2	6	1
T1236JC	21236	1	2	2	7	1
T1236JC	21236	1	2	2	8	1
T1236JC	21236	1	2	2	9	1
T1236JC	21236	1	2	2	10	1
T1236JC	21236	1	2	2	11	1
T1236JC	21236	2	2	2	13	1
T1236JC	21236	1	2	2	14	1
T1236JC	21236	1	2	2	15	1
T1236JC	21236	1	2	2	16	1
T1236JC	21236	1	2	2	17	1
T1236JC	21236	1	2	2	18	1
T1236JC	21236	1	2	2	19	1
T1236JC	21236	1	2	2	20	1
T1236JC	21236	1	2	2	21	1
T1236JC	21236	1	2	2	22	1
T1236JC	21236	1	2	2	23	1
T1236JC	21236	1	2	2	24	1
T1236JC	21236	1	2	2	25	1
T1236JC	21236	1	2	2	26	1
T1236JC	21236	1	2	2	27	1
T1236JC	21236	1	2	2	28	1
T1236JC	21236	1	2	2	29	1
T1247JC	21247	1	2	2	1	1
T1247JC	21247	1	2	2	2	1
T1247JC	21247	1	2	2	3	1
T1247JC	21247	2	2	2	5	1
T1247JC	21247	1	2	2	6	1
T1247JC	21247	1	2	2	7	1
T1247JC	21247	1	2	2	8	1
T1247JC	21247	1	2	2	9	1
T1247JC	21247	1	2	2	10	1
T1247JC	21247	1	2	2	11	1
T1247JC	21247	1	2	2	12	1
T1247JC	21247	1	2	2	13	1
T1247JC	21247	1	2	2	14	1
T1247JC	21247	1	2	2	15	1
T1247JC	21247	1	2	2	16	1
T1247JC	21247	1	2	2	17	1
T1247JC	21247	1	2	2	18	1
T1247JC	21247	1	2	2	19	1
T1247JC	21247	1	2	2	20	1
T1247JC	21247	2	2	2	22	1
T1247JC	21247	1	2	2	23	1
T1247JC	21247	1	2	2	24	1
T1247JC	21247	1	2	2	25	1
T1247JC	21247	1	2	2	26	1
T1247JC	21247	1	2	2	27	1
T1247JC	21247	1	2	2	28	1
T1247JC	21247	1	2	2	29	1
T1247JC	21247	1	2	2	30	1
T1248JA	21248	1	2	2	1	1
T1248JA	21248	1	2	2	2	1
T1248JA	21248	2	2	2	4	1
T1248JA	21248	1	2	2	5	1
T1248JA	21248	1	2	2	6	1
T1248JA	21248	1	2	2	7	1
T1248JA	21248	1	2	2	8	1
T1248JA	21248	1	2	2	9	1
T1248JA	21248	1	2	2	10	1
T1248JA	21248	1	2	2	11	1
T1248JA	21248	1	2	2	12	1
T1248JA	21248	1	2	2	13	1
T1248JA	21248	1	2	2	14	1
T1248JA	21248	1	2	2	15	1
T1248JA	21248	1	2	2	16	1
T1248JA	21248	1	2	2	17	1
T1248JA	21248	1	2	2	18	1
T1248JA	21248	1	2	2	19	1
T1248JA	21248	2	2	2	21	1
T1248JA	21248	1	2	2	22	1
T1248JA	21248	1	2	2	23	1
T1248JA	21248	1	2	2	24	1
T1248JA	21248	1	2	2	25	1
T1248JA	21248	1	2	2	26	1
T1248JA	21248	1	2	2	27	1
T1248JA	21248	1	2	2	28	1
T1248JA	21248	1	2	2	29	1
T1248JB	21248	1	2	2	1	0
T1253JA	21253	1	2	2	1	1
T1253JA	21253	1	2	2	2	1
T1253JA	21253	1	2	2	3	1
T1253JA	21253	1	2	2	4	1
T1253JA	21253	1	2	2	5	1
T1253JA	21253	1	2	2	6	1
T1253JA	21253	1	2	2	7	1
T1253JA	21253	1	2	2	8	1
T1253JA	21253	1	2	2	9	1
T1253JA	21253	2	2	2	11	1
T1253JA	21253	1	2	2	12	1
T1253JA	21253	1	2	2	13	1
T1253JA	21253	1	2	2	14	1
T1253JA	21253	1	2	2	15	1
T1253JA	21253	1	2	2	16	1
T1253JA	21253	1	2	2	17	1
T1253JA	21253	1	2	2	18	1
T1253JA	21253	1	2	2	19	1
T1253JA	21253	1	2	2	20	1
T1253JA	21253	1	2	2	21	1
T1253JA	21253	1	2	2	22	1
T1253JA	21253	1	2	2	23	1
T1253JA	21253	1	2	2	24	1
T1253JA	21253	1	2	2	25	1
T1253JA	21253	1	2	2	26	1
T1253JA	21253	1	2	2	27	1
T1253JB	21253	1	2	2	1	1
T1253JB	21253	1	2	2	2	0
T1253JC	21253	1	2	2	1	1
T1253JC	21253	1	2	2	2	0
T1268JA	21268	1	2	2	1	1
T1268JA	21268	1	2	2	2	1
T1268JA	21268	1	2	2	3	1
T1268JA	21268	1	2	2	4	1
T1268JA	21268	1	2	2	5	1
T1268JA	21268	1	2	2	6	1
T1268JA	21268	1	2	2	7	1
T1268JA	21268	1	2	2	8	1
T1268JA	21268	1	2	2	9	1
T1268JA	21268	1	2	2	10	1
T1268JA	21268	1	2	2	12	1
T1268JA	21268	1	2	2	13	1
T1268JA	21268	1	2	2	14	1
T1268JA	21268	1	2	2	15	1
T1268JA	21268	1	2	2	16	1
T1268JA	21268	1	2	2	17	1
T1268JA	21268	1	2	2	18	1
T1268JA	21268	1	2	2	19	1
T1268JA	21268	1	2	2	20	1
T1268JA	21268	1	2	2	21	1
T1268JA	21268	1	2	2	22	1
T1268JA	21268	1	2	2	23	1
T1268JA	21268	1	2	2	24	1
T1268JA	21268	1	2	2	25	1
T1268JA	21268	1	2	2	26	1
T1268JA	21268	1	2	2	27	1
[truncated: 295 more rows]
